# Supplementary material for: A Scoping Review of the Ergonomics of Handheld Surgical Robots
Source: Research Square preprint supplement (doi:10.21203/rs.3.rs-8051435/v1), 2025-12-05
Supplement: Supplementary file 1 [file d00b1413efe5d990bca18d88.xlsx]

## Sheet: Table S1 - Included Studies
Title	Authors	Study design	Surgical subspecialty	Surgical intervention	Surgical robot	Setting	Total study duration	Participant recruitment/selection/allocation	Level of evidence	Study quality	Concerns about bias	Total number of participants	Country	Ergonomic outcomes recorded?	Ergonomic design features recorded?	Subjective ergonomic outcomes	Objective ergonomic outcomes	Ergonomic design features	Time points	Outcome definition	Unit of measurement	Number of participants allocated to each intervention group	Summary data for each intervention group	Estimate of effect with confidence interval/p value	Key conclusions of study authors	Funding source
Learning curve for robotic assisted total knee arthroplasty: our experience with imageless hand‑held Navio system	Narendra Vaidya, Anup Gadekar, Varun O. Agrawal, Tanmay N. Jaysingani	Single‑centre retrospective observational comparative learning‑curve study	Orthopaedic surgery – knee arthroplasty	Robotic‑assisted total knee arthroplasty (posterior‑stabilised design) compared with conventional jig‑based TKA	Navio™ imageless hand‑held system (Smith & Nephew)	Lokmanya Hospital, Pune, India (single surgeon/team, operating theatre)	June 2017–December 2017 (≈7 months)	First 75 unilateral RA‑TKA cases (consecutive) plus 25 randomly selected conventional jig‑based TKA	Level III (retrospective comparative; not stated in paper)	Fair (non‑randomised, single centre, short window)	Selection bias (first 75 robotic cases), single surgeon/team, no adjustment for patient factors, learning‑curve by design	100 surgeries (75 robotic, 25 conventional)	India	NA	NA	NA	NA	NA	Intraoperative phase times per case grouped as A (cases 1–25), B (26–50), C (51–75), plus conventional comparator	Operative time for registration, planning, cutting phases and total time from incision to implantation	Minutes	RA Group A=25, RA Group B=25, RA Group C=25, Conventional=25	Group A (RA): Registration 6.12±1.8, Planning 5.08±1.01, Cutting 28.22±6.24, Total 39.42±8.02 | Group B (RA): Registration 4.46±0.79, Planning 4.04±0.37, Cutting 22.49±0.79, Total 31.00±1.22 | Group C (RA): Registration 4.17±0.59, Planning 4.01±0.35, Cutting 22.36±0.88, Total 30.53±1.14 | Conventional: Total 30.54±1.14 (no phase breakdown)	A vs B: p<0.001 for all phases and total; B vs C: p=0.14 (registration), 0.75 (planning), 0.58 (cutting), 0.17 (total); A vs C: p<0.001 for all; A vs Conventional: p<0.001 (total); B vs Conventional: p=0.17 (total); C vs Conventional: p=0.99 (total)	Learning curve of ~25 cases; after 25 cases, RA‑TKA times approached conventional; increased OR time is an early barrier but declines with team experience	No external funding
UKA with a handheld robotic device results in greater surgeon physiological stress than conventional instrumentation.	Amer Haffar, Chad A. Krueger, Graham S. Goh, Jess H. Lonner	Prospective comparative non-randomised single-surgeon two-group study	Orthopaedic surgery – knee arthroplasty	Unicompartmental knee arthroplasty (fixed-bearing medial)	Navio handheld robotic system (Smith & Nephew, Memphis TN)	Single orthopaedic specialty hospital (Rothman Orthopaedic Institute at Thomas Jefferson University)	September 2020 – March 2021 (≈ 7 months)	Consecutive series of 30 unilateral UKAs (15 robotic then 15 conventional) by one experienced arthroplasty surgeon	II	Moderate	Single surgeon and centre, small sample size, non-random allocation, no blinding, industry funding with declared conflict of interest	30 surgeries (15 rUKA, 15 cUKA)	USA	Yes	Yes	NA	Heart rate, heart rate variability, respiratory rate, minute ventilation, calorie expenditure, neck/lumbar/shoulder angles, time in static and demanding positions (recorded with Hexoskin and APDM Opal sensors)	Handheld 6 mm motorised burr with haptic control and optical tracking arrays	Continuous intraoperative recording per case	Demanding positions defined as > 10° neck flexion, > 20° lumbar flexion, > 45° shoulder abduction	Degrees, percent time, minutes per case, beats per minute, respirations per minute, litres per minute, calories	15 rUKA and 15 cUKA	rUKA: operative time 45.9 ± 9 min, energy 154 ± 43 cal (3.3 ± 1 cal/min), heart rate 88.7 ± 4 bpm, HRV 12.4 ± 1 ms, RR 18.5 ± 1 rpm, MV 15.4 ± 2 L/min, neck flex –23.4 ± 13°, lumbar –14.8 ± 4°, shoulder R/L 32.2°/23.6°, demanding neck 60 %, lumbar 29 %, shoulder R/L 22 %/17 %; cUKA: operative time 32.0 ± 7 min, energy 89.1 ± 22 cal (2.8 ± 1 cal/min), heart rate 84.7 ± 5 bpm, HRV 13.4 ± 2 ms, RR 1…	Operative time p < 0.001, energy p < 0.001, energy/min p = 0.015, HR p = 0.027, HRV p = 0.056, neck flexion p < 0.001, shoulder R/L abduction p = 0.002/0.009, lumbar > 20° p < 0.001, neck > 10° p = 0.001, shoulder > 45° R/L p < 0.001/0.006 (others NS)	Handheld robotic assistance in UKA reduced neck flexion but increased shoulder abduction, heart rate and energy expenditure – the theoretical ergonomic and physiologic advantages were not realized	Grant from Smith & Nephew (Memphis TN), author J.H. Lonner reports royalties, consulting and research support from Smith & Nephew
Can a Fully Articulating Electromechanical Laparoscopic Needle Driver Compare with a Robotic Platform in Transabdominal Preperitoneal Inguinal Hernia Repair?.	Diego Laurentino Lima; Xavier Pereira; Flavio Malcher	Retrospective comparative observational study (single‑surgeon video review with learning‑curve analysis and basic cost analysis)	General surgery - abdominal wall/hernia	Transabdominal preperitoneal (TAPP) inguinal hernia repair (mesh fixation and peritoneal flap closure)	HandX (Human Xtensions) handheld articulating electromechanical needle driver; comparator: da Vinci Surgical System (Intuitive)	Single academic medical centre, Montefiore Medical Centre (New York, USA)	NR	27 consecutive HandX cases compared with a recent consecutive series of 27 da Vinci cases by the same surgeon; primary inguinal hernias only; exclusions: prior pelvic surgery or radiation; bilateral repairs counted per side	Not stated (likely Level III - retrospective comparative study)	NR	Single‑surgeon, nonrandomised consecutive series; small, underpowered sample; learning‑curve effects; greater surgeon experience with da Vinci; sides in bilateral cases analysed independently; capital costs excluded from cost analysis	54 cases (27 HandX; 27 da Vinci); number of unique patients NR (sides counted independently)	USA	NA	NA	NA	NA	HandX features described: handheld electromechanical device with articulating “wrist‑like” head; lightweight, one‑handed use; software‑driven multidirectional movement; wireless data; da Vinci features noted: 3D vision, tremor filtration, movement scaling, image inversion, enhanced teaching	Intraoperative only - per step (mesh fixation, peritoneal closure); also stratified by learning‑curve groups (G1–G3; after‑LC=G2+G3) and by side (right/left)	Primary: total time to mesh fixation and to peritoneal closure; Secondary: time per stitch and total number of stitches; plus direct per‑case instrument cost (excluding capital cost and mesh/suture)	Seconds (time), count (stitches), US dollars (cost)	HandX: 27 cases total (LC n=9; after‑LC n=18; for peritoneal closure after‑LC right n=9, left n=9); da Vinci: 27 cases total (peritoneal closure right n=16, left n=11)	HandX after‑LC - mesh fixation 391.5 s (SD 95.9), time/stitch 129.7 s (31.6); peritoneal closure 634.5 s (159.5), stitches 18.1 (3.3), time/stitch 34.6 s (10.5); cost $310/case. da Vinci - mesh fixation 258.1 s (100.4), time/stitch 86.0 s (33.4); peritoneal closure 418.6 s (192.1), stitches 24.2 (6.8), time/stitch 17.2 s (5.3); cost $973/case. Side‑specific peritoneal closure - Right: HandX 520.1…	HandX after‑LC vs da Vinci - mesh fixation: +133.4 s (slower), p<.001; mesh time/stitch: +43.7 s, p<.001; peritoneal closure: +215.9 s, p<.001; stitches: −6.1, p<.001; peritoneal time/stitch: +17.4 s, p<.001. Side‑specific peritoneal closure - Right total time NS (p=.353); right time/stitch +9.2 s, p=.026; left total time +367.5 s, p<.001; left time/stitch +26.0 s, p<.001; left stitches −5.1, p=.…	Robotic platform completed tasks faster, but the handheld articulating device may offer a cost‑conscious, readily deployable alternative that brings some robotic benefits to laparoscopy; ergonomics were not evaluated; Limitations acknowledged include retrospective single‑surgeon design and small sample	No funding was received
Robotic Handle Prototypes for Endoscopic Endonasal Skull Base Surgery: preclinical Randomised Controlled Trial of Performance and Ergonomics.	Emmanouil Dimitrakakis, Holly Aylmore, Lukas Lindenroth, George Dwyer, Joshua Carmichael, Danyal Z. Khan, Neil L. Dorward, Hani J. Marcus, Danail Stoyanov	Pre‑clinical randomised cross-over user‑study (described by authors as a pre‑clinical RCT) comparing two handheld robotic handle prototypes vs a standard instrument	Neurosurgery (endoscopic endonasal skull‑base surgery)	Simulated peg‑transfer task representative of EEEA performed in a constrained skull‑base workspace	Two handheld robotic instrument handles: Rotating Joystick‑Body Handle (RJH) and Forearm‑Mounted Handle (FMH)	Preclinical lab at UCL using a custom virtual simulator (CoppeliaSim), optically tracked tools, and a 3D‑printed skull constraint	Per participant ≈70 minutes active protocol (10×2‑min attempts per device with no intra‑device breaks, plus two 5‑min breaks between devices)	Nine medical students (novices); randomised cross-over order (two‑thirds covered all six device sequences, remaining three random order); gloves worn; hand anthropometrics measured; UCL REC approval 18035/001	Not applicable (pre‑clinical simulation study)	Moderate for ergonomics/performance evaluation (randomised cross-over; validated metrics [RULA, SURG‑TLX]; small N; novice cohort; lab setting)	Potential performance/observer bias (developers as authors; unblinded; manual time recording; participant controls endoscope as well as instrument); selection bias (novices not expert surgeons); one early termination due to shoulder discomfort	9	United Kingdom	Yes	Yes	SURG‑TLX total workload (mean): Standard 209.22, RJH 148.55, FMH 142.44; initial handle‑evaluation ratings favoured RJH for intuitiveness (4.1/5) and comfort (4/5); post‑task preference: 6/9 favoured FMH, 3/9 RJH (SURG‑TLX totals; see Table 1, p.11).	RULA mean overall score: RJH 3.2 (low risk), FMH 4.3 (low–medium risk), Standard 5.4 (medium risk); posture subgroup findings reported for upper/lower arm, wrist, neck, trunk, legs (see Fig. 6)	RJH: rotating joystick‑body, thumb‑operated 2‑axis joystick for pitch/yaw, index‑finger trigger for gripper, 45° handle‑shaft, large palmar grip; FMH: forearm‑mounted 3‑DoF gimbal joystick + rotating pen‑like gripper control, direct wrist‑to‑robot DoF mapping, straps; FMH approx. 42 cm L, 16 cm H, 431 g	Per device: 10 attempts (max 2 min each) with no intra‑device breaks; 5‑min break between devices; RULA scored at worst posture; SURG‑TLX completed after each device; initial face‑validity questionnaire before tasks	Completion rate = % of 6 rings transferred; successful attempt = all 6 rings transferred; mean time to transfer each ring; RULA overall/posture subscores; SURG‑TLX weighted dimensions	Completion rate (%), successful attempt rate (%), time (seconds), RULA score (1–7), SURG‑TLX composite scores	cross-over: all 9 participants used all 3 devices; one participant terminated FMH early due to shoulder discomfort	Performance: median rings transferred - Standard 4, RJH 6, FMH 6; successful attempt rate - Standard 0%, RJH and FMH >0% (RJH more consistent learning curve); mean time to complete 6 rings - FMH 87.1 s, RJH 106.7 s; Ergonomics: RULA mean - RJH 3.2, FMH 4.3, Standard 5.4; SURG‑TLX total workload (means) - Standard 209.22, RJH 148.55, FMH 142.44 (Table 1, p.11; Fig. 5–6).	Not reported (descriptive comparisons; no CIs/p‑values given).	Both robotic handles outperformed the standard instrument; RJH offered the best balance of performance and ergonomics and is deemed the more suitable driver for endoscopic endonasal skull‑base instrumentation.	Wellcome/EPSRC Centre for Interventional and Surgical Sciences (WEISS) at UCL (203145Z/16/Z); EPSRC (EP/P027938/1, EP/R004080/1, EP/P012841/1); H2020 FET (GA 863146); NIHR (including Academic Clinical Fellowship support); National Brain Appeal; Royal Academy of Engineering Chair in Emerging Technologies (CiET1819\2\36).
Evaluation of new motorised articulating laparoscopic instruments by laparoscopic novices using a standardized laparoscopic skills curriculum.	Daniel Uysal, Claudia Gasch, Rouven Behnisch, Felix Nickel, Beat Peter Müller‑Stich, Markus Hohenfellner, Dogu Teber	Randomised two‑sequence two‑period cross‑over trial in a simulation lab	Urology (basic laparoscopic skills)	E‑BLUS tasks - peg transfer, cutting a circle, needle guidance, laparoscopic suturing	Karl Storz motorised articulating laparoscopic instruments (handheld robotic device): needle holder, bipolar forceps, bipolar scissors with external motor unit	Simulation box‑trainer (2D vision) at Heidelberg University Hospital, Germany	Single‑session per participant with warm‑up, two runs separated by a 10‑min cooldown, overall study period not reported	50 medical students/residents with no prior laparoscopy, randomised 1:1 to sequence CA (CLI then ALI) or AC (ALI then CLI), dominant hand used for ALI	Not applicable to clinical LOE (lab‑based RCT without patient outcomes)	Moderate (randomised cross‑over and standardized curriculum, but unblinded and lab‑based)	Potential industry influence as devices supplied by manufacturer, one author reports relationships, unblinded performance assessment, novices only, exclusion of failed attempts from time analyses, dominant‑hand ALI use, bespoke nonvalidated usability questionnaire	50	Germany	Yes	Yes	61% reported easier knot‑tying/suturing with ALI, 88% said ALI scissors facilitated circle cutting, 94% felt ALI would help in narrow spaces, 90% for working around structures, 73% for sloped planes	NA	Motorised flexion and 360° tip rotation, pistol handle with front‑mounted controls, 7 degrees of freedom via motor unit, heavier instrument mass	Two runs per participant (Period 1 and Period 2) with cross‑over order AC or CA	Primary: time to completion per exercise, number of errors, and exercise failure defined as not completing within allotted time	Time in min:s, errors as counts, failures as counts, usability as categorical responses and percentages	AC 25, CA 25 (all 50 used both ALI and CLI due to cross‑over)	CLI vs ALI least‑squares mean times - Overall 4:27 vs 4:50, Peg transfer 3:13 vs 3:12, Cutting a circle 2:44 vs 2:40, Needle guidance 5:36 vs 7:05, Laparoscopic suturing 6:15 vs 6:24; Failures (CLI vs ALI) - PT 2 vs 2, CC 1 vs 1, NG 0 vs 12, LS 7 vs 13	ALI–CLI differences with 95% CI and p - PT −0.3 s (−17.5 to 16.9), p 0.97 | CC −4.0 s (−15.0 to 7.0), p 0.47 | NG 88.9 s (50.2 to 127.6), p <0.0001 | LS 9.1 s (−35.4 to 53.7), p 0.68 | Overall p 0.005	Using new motorised ALI led to slower performance and more failures than CLI for novices, likely due to added complexity and learning curve, though extra degrees of freedom were valued and may aid training or specific tasks	No direct financial funding reported, functional samples supplied in‑kind by Karl Storz, Open Access funding by Projekt DEAL, disclosures note author relationships.
Handheld robotic needle holder training: slower but better.	Jing Feng, Zhiyuan Yan, Man Li, Zhang Zhang, XiaoJia Chen, Zhijiang Du, Kun Yang	Prospective randomised controlled laboratory study (simulation)	Minimally invasive/laparoscopic surgery (training)	Intracorporeal continuous suturing on simulated skin and a force‑sensing ring platform	Original handheld electric laparoscopic robotic needle holder (Wuhan University & Harbin Institute of Technology), 7 degrees of freedom with foot‑pedal clutch	Academic simulation lab using a training box, force‑sensing test platform, and multi‑screen video recording	Per participant ~15 hours total training on average, with 1‑hour sessions every 3 days until plateau (conventional ~10 h, robotic ~13 h)	Forty medical undergraduates (novices) from Wuhan University, right‑handed, consented; web‑based randomisation to conventional vs robotic groups	Level II (randomised study in simulation, non‑clinical)	Moderate - randomisation and objective force metrics, but no blinding and non‑clinical endpoints	Potential performance bias (unblinded operators), limited generalisability beyond novices, some ring‑specific analyses, attrition not detailed	40	China	NA	Yes	NA	NA	Articulating wristed tip with ergonomic handle, foot‑pedal clutch, control box with visual/auditory alerts enabling handle reposition while tip locked	Baseline then after each 1‑hour session up to 15 hours (tests every 72 hours), plateau reached at ~10 h for conventional and ~13 h for robotic	MF defined as peak force during passage through each ring, IMP as force‑time integral (cumulative load)	MF in Newtons (N), IMP in Newton‑seconds (N·s) (see Figures 5–6)	Conventional n=20, Robotic n=20	Both groups’ MF and IMP decreased over time; conventional plateau by ~10 h, robotic by ~13 h; at 13 h robotic MF < conventional MF; IMP differences at plateau varied by ring and were generally not consistently different	MF at 13 h: robotic < conventional with P<0.05 (exact values not reported); IMP ring‑specific examples at 13 h include Ring 1 P=0.001, Ring 3 P=0.003, Ring 9 P=0.036, Ring 10 P=0.022	Handheld robotic holder required a longer learning period but achieved lower plateau suture force; MF was a more sensitive metric than IMP	Youth Talent Project of the Health Commission of Hubei Province (WJ2019Q050) and Hubei Provincial Teaching Reform Research Project (2018038).
Preliminary experience with an image-free handheld robot for total knee arthroplasty: 77 cases compared with a matched control group.	P. Bollars, A. Boeckxstaens, J. Mievis, S. Kalaai, M. G. M. Schotanus, D. Janssen	Retrospective matched case‑controlled comparative study	Orthopaedic surgery (knee arthroplasty)	Primary total knee arthroplasty (robot‑assisted vs conventional intramedullary alignment)	NAVIO Surgical System (Smith & Nephew) - image‑free handheld robotic sculpting system	Single‑centre hospital (St. Trudo Hospital, Sint‑Truiden, Belgium)	Recruitment May 2018–March 2019; outcomes to 6 weeks post‑op	Consecutive robotic TKAs (n=79) with 2 intra‑op conversions excluded → 77; matched 1:1 to 77 conventional TKAs by sex, age, implant type and follow‑up; two surgeons	Level III (retrospective comparative)	Moderate	Retrospective design, single centre, short follow‑up (6 weeks), small sample and post‑hoc power 0.669, potential learning‑curve effects, two robot conversions excluded, imperfect inter‑observer reliability for some sagittal measures, and author COI (two consultants for Smith & Nephew)	154 (77 robot; 77 control)	Belgium	NA	NA	NA	NA	NA	Pre‑operative, intra‑operative (robot planned/achieved), and 6 weeks post‑operative radiographs	Primary - post‑operative mechanical axis (MA); secondary - component alignment (FFC, FTC, LFC, LTC), proportion of “outliers” (>3° deviation from planned alignment), and operating theatre time	Degrees (°) for alignment, % for outliers, minutes for operating time	Robot n=77; Conventional n=77	Robot - Post‑MA 180.1° (SD 1.9), outliers 5/77 (6%); FFC 91.8° (1.8), outliers 11/77 (14%); FTC 90.4° (1.2), outliers 0/77 (0%); LFC 8.9° (2.9), outliers 66/77 (86%); LTC 88.7° (2.1), outliers 13/77 (17%); OR time 102 (16) min. Conventional - Post‑MA 179.1° (3.1), outliers 14/77 (18%); FFC 92.0° (2.2), outliers 15/77 (19%); FTC 89.4° (2.0), outliers 6/77 (8%); LFC 7.6° (2.8), outliers 48/77 (62%)…	Post‑MA difference significant (group means 180.1° vs 179.1°; 95% CI for between‑group difference as reported: [−1.9, −0.1]; p=0.028). FTC mean difference significant (95% CI [−1.6, −0.4]; p=0.001). LFC mean difference significant (95% CI [−2.2, −0.3]; p=0.006). LTC mean difference significant (95% CI [2.1, 3.5]; p<0.001). Outliers: MA 6% vs 18% (p=0.051); FTC 0% vs 8% (p=0.038). OR time longer w…	The handheld image‑free robot achieved the planned mechanical axis with fewer outliers than conventional technique and more accurate tibial component positioning, but the clinical relevance is uncertain; OR time was longer; larger randomised trials with longer follow‑up are needed	No specific grant; two authors (PB, JM) report consultancy for Smith & Nephew (NAVIO).
Handheld laparoscopic robotised instrument: progress or challenge?.	Jing Feng, Kun Yang, Zhang Zhang, Man Li, XiaoJia Chen, Zhiyuan Yan, Zhijiang Du, XingHuan Wang	Prospective nonrandomised controlled bench‑top simulation study (within‑subject comparison of conventional vs handheld robotised needle holder; novices vs experts)	Laparoscopic surgery (experts from urology, general surgery, gynaecology)	Simulated laparoscopic suturing/needle‑passing (thread through 12 rings in a trainer box)	Original handheld laparoscopic robotised needle holder (electric articulated‑tip needle holder with control box and clutch pedal; 7 DOF) developed by Wuhan University & Harbin Institute of Technology	Single‑centre skills‑lab/force‑sensing test platform with multi‑screen video recording (ZhongNan Hospital of Wuhan University, China)	Per participant: baseline assessment then 6 h training over three 2‑h sessions separated by two 24‑h breaks (≥48 h) followed by post‑training test	40 volunteers: 20 fourth‑year medical students without laparoscopic experience (10 male/10 female; mean age 23 ± 1.8) and 20 surgeons performing >100 cases/year (15 male/5 female; mean age 40 ± 6.7; 6 urologists, 8 general surgeons, 6 gynaecologists); all did baseline with conventional instrument then trained and retested with the robotised instrument (no randomisation)	Oxford Level of Evidence 5 (bench/simulation study)	Low–moderate quality (objective metrics but fixed order, short training, single‑centre convenience sample, no blinding)	Potential biases: selection bias; order/learning‑curve and novelty effects; detection bias from manual filtering of force traces via video; developer‑institution involvement; small sample	40	China	NA	Yes	NA	NA	Ergonomic handle; articulated tip (7 DOF); clutch pedal to decouple and reposition handle; control box; wired handle	Baseline with conventional needle holder, then after 6 h training with robotised needle holder; measures per ring (12 rings)	Maximum force (MF): highest resultant force at each ring; Impulse (IMP): integral of force over time (area under force‑time curve) per ring	Force in Newtons (N); Impulse in N·s	Within‑subject design - Conventional baseline n=40 (novices 20; experts 20); robotised post‑training n=40 (novices 20; experts 20)	Novices had higher MF and IMP than experts at baseline and after training across all 12 rings; within‑group comparisons of robotised vs conventional were largely non‑significant; numeric group means/SD not reported (box plots only)	Between‑group (novices vs experts): all comparisons P<0.05 for MF and IMP on both instruments across 12 rings; Within‑group exceptions: novices MF ring 1 P=0.030; experts MF ring 9 P=0.006; experts IMP ring 4 P=0.048 and ring 9 P=0.037; CIs not reported	Authors conclude MF and IMP from the force‑sensing platform discriminate skill level; 6 h training suffices for experts to master the robotised needle holder but is insufficient for novices; the robotised device did not show superiority over conventional in this short training; platform useful for training and evaluation	Project Innovation Team of Hubei Province (WJ2017C0004) and Fundamental Research Funds for Central Universities (2042017kf0164).
Assessment of Postural Ergonomics and Surgical Performance in Laparoendoscopic Single-Site Surgery Using a Handheld Robotic Device.	Francisco Miguel Sánchez‑Margallo, Juan A. Sánchez‑Margallo	Experimental comparative study (simulator/ex vivo + porcine in vivo), within‑subject repeated measures with randomised starting instrument	Urology and Colorectal (general surgery)	LESS intracorporeal suturing tasks (precision and urethrovesical anastomosis) on simulator/ex vivo, LESS partial nephrectomy haemostasis and sigmoidectomy anastomosis in porcine model	Kymerax handheld precision‑drive articulating laparoscopic system (Terumo Europe)	Laparoscopic training simulator (SIMULAP) and experimental operating theatre with porcine model at Jesús Usón Minimally Invasive Surgery Centre (Spain)	2 months for training phase (nine repetitions)	Seven right‑handed surgeons - 4 experienced (>100 lap cases; no prior Kymerax) performed simulator/ex vivo tasks and 3 experienced in LESS (>20 cases) familiarized with Kymerax performed porcine procedures; participants used both conventional and robotic instruments	Not applicable (preclinical/experimental)	Not formally graded	Small sample, non‑blinded assessments, learning effects over time, differing prior device familiarity across subgroups, unclear per‑procedure allocation counts in animal phase	7 surgeons	Spain	Yes	Yes	NA	Objective measures included elbow extension, shoulder flexion/abduction (motion capture), wrist flexion and modified RULA score, finger joint angles and finger separation (data glove)	6 DOF articulating tip, handle interface, 8.8 mm shaft, interchangeable instruments	T1 (first) and T9 (last) repetitions across nine training sessions over 2 months; in vivo measures taken during partial nephrectomy haemostasis and sigmoidectomy anastomosis	Precision = distance from needle entry/exit to target centre; needle errors = attempts to position/drive needle; joint posture by angles; wrist risk by modified RULA; performance by time	Minutes, millimetres, degrees, RULA score (1–3)	Within‑subject design - training: 4 surgeons used both instruments; animal phase: 3 surgeons with comparative data for both instruments (exact per‑arm counts not explicitly stated)	Key group data - T9 urethrovesical anastomosis time: conventional 3.570 ± 1.334 min vs robotic 4.174 ± 1.356 min; precision (horizontal): conventional 0.860 ± 0.172 mm vs robotic 1.140 ± 0.440 mm; needle‑position attempts: vertical conventional 1.125 ± 0.250 vs robotic 1.625 ± 0.250; horizontal conventional 1.625 ± 0.250 vs robotic 1.118 ± 0.375; elbow extension (T9): conventional 134.681 ± 14.35…	Wilcoxon signed‑rank tests used; differences reported as p < 0.05 when stated; no confidence intervals reported	Authors conclude a positive learning curve with the handheld robotic instrument; improved body‑posture ergonomics and fewer needle‑positioning errors in horizontal sutures; LESS partial nephrectomy and sigmoidectomy are feasible and safe with the device; comparable performance to conventional tools but require prior training	Government of Extremadura (Spain), European Regional Development Fund (GR15175), European Social Fund (PO14034), work performed within ICTS “NANBIOSIS.”
Performance of Kymerax© precision-drive articulating surgical system compared to conventional laparoscopic instruments in a pelvitrainer model.	Sieber MA, Fellmann‑Fischer B, Mueller M	Randomised cross-over (order‑randomised) comparative simulation study in a pelvitrainer (blinded scoring for the “fraying factor”)	Gynaecology (laparoscopic surgery perspective)	Simulated laparoscopic tasks - pin placement, suturing on felt at 140°/30°/270°, circular and straight cutting on foam rubber	Kymerax© Precision‑Drive Articulating Surgical System (Terumo) - handheld laparoscopic robot with ~85° tip deflection and up to 270° tip rotation via digital buttons, 7‑mm shaft	Pelvitrainer simulation lab set up at University of Bern/Inselspital Bern, Switzerland	Not reported (single‑session experiment per participant)	20 expert surgeons (>50 laparoscopic procedures/year) and 25 medical students (no surgical experience) randomised to TLI‑first→Kymerax (TK) vs Kymerax‑first→TLI (KT)	N/A (preclinical simulation - no patient outcomes)	Moderate	Potential learning/fatigue and order effects, some prior exposure to Kymerax (2 experts clinical, 6 pelvitrainer), no sample size calculation, mostly unblinded outcomes, ipsilateral port setup and fixed camera may disadvantage TLI and impair view	45	Switzerland	Yes	Yes	Higher perceived difficulty for suturing (mean 7.46/10) and earlier loss of concentration with Kymerax (60% remained focused vs 80% with TLI); 9 participants never felt fully accustomed to Kymerax; handle commonly rated non‑ergonomic; impaired view frequently noted	NA	Rotation/deflection limits, handle shape/controls, shaft diameter affecting view, instrument weight, digital tip control, force transmission/closing force	During each of four tasks	Task 1 - time to place six pins, mistakes = dropped pin. Task 2 - time, deviation from marked dots (mm) for three stitches at 140°/30°/270°, mistakes = needle pulled before completion. Task 3 - time, maximum deviation (mm) on a circle, fraying factor 0–10 (blinded). Task 4 - time, maximum deviation (mm) on crossed straight lines, fraying factor 0–10 (blinded)	Seconds, millimetres, count of mistakes, 0–10 analogue scales (fraying; task difficulty)	Allocation to TK vs KT not stated (all 45 completed both modalities in cross-over)	~35–40% longer times with Kymerax overall; suturing at 30° more precise with Kymerax (~45% less deviation); cutting produced smoother edges with Kymerax (fraying factor ~32% lower) and straighter cuts had ~18% less deviation; error counts similar	Time (task 2) p=0.002; experts’ time (task 3) p<0.001; straight‑cut deviation p=0.02; fraying factor (tasks 3 & 4) p<0.001; suturing 30° exit‑point deviation p=0.004	Kymerax allows precise work at difficult angles and less fraying on complex cuts but is slower, associated with earlier fatigue/loss of concentration, and requires ergonomic/functional refinements	No external funding stated; equipment loan only (standard laparoscopy instruments from Anklin AG, Kymerax provided by Terumo for study duration).
A handheld Assistant for Semiautomated Percutaneous Needle Steering.	Carlos Rossa; Nawaid Usmani; Ronald Sloboda; Mahdi Tavakoli	Preclinical experimental bench (phantom) and ex‑vivo validation study	Urology - prostate brachytherapy	Percutaneous prostate brachytherapy needle insertion/seed implantation assistance	Hand‑held needle steering assistant (semiautomated; axial rotation + optional longitudinal micro‑vibration guided by ultrasound‑based model/planner; ~160 g)	Laboratory: gelatine phantoms (15% & 20%) and ex‑vivo beef tenderloin embedded in gelatine	NR	N/A - no human/animal participants	N/A - preclinical engineering validation	Not assessed	Bench/ex‑vivo only; imaging noise and measurement uncertainty (~0.2 mm) and possible inadvertent wrist rotation noted by authors; limited tissue models; no randomisation/blinding	0	Canada	NA	Yes	NA	NA	Lightweight (≈160 g) hand‑held device; axial rotation via DC motor + encoder; optional piezoelectric micro‑vibrations; compact handle compatible with existing workflow	During insertion at target depths df = 130 mm and 150 mm and over the 50 mm preceding df; vibration tests 0–1200 Hz and 0–40 V	J1: needle‑tip deflection at target depth; J2: average tip deflection over the 50 mm before target; model prediction error = |predicted–measured|; also insertion force and friction coefficient in vibration tests	mm (deflection), N (force), Hz (vibration frequency), V (actuator voltage)	N/A - no participants; 6 insertions per scenario; 12 scenarios (3 tissues × 2 target depths × 2 steering cases) = 72 insertions	Case 1 (minimize J1): mean tip deflection 0.43 ± 0.19 mm (max 0.77, min 0.27); Case 2 (minimize J2): mean deflection over preceding 50 mm 0.36 ± 0.17 mm; average model prediction error across 72 insertions 0.33 ± 0.17 mm; vibration tests: insertion force reduced 48% at 1200 Hz; friction coefficient reduced 35% at 40 V (100 Hz); cutting force unchanged with vibration	No CIs/p‑values reported (descriptive means/SDs)	Semiautomated hand‑held assistant integrates with current practice, keeps surgeon in control, and achieved sub‑millimetre targeting accuracy in phantom/ex‑vivo tests - suggesting potential to improve focal prostate brachytherapy	NSERC (CHRP 446520); CIHR (CPG 127768); Alberta Innovates – Health Solutions (CRIO 20120012).
Handheld Active Add-On Control Unit for a Cable-Driven Flexible Endoscope.	Julie Legrand, Allan Javaux, Mouloud Ourak, Dirk Wenmakers, Tom Vercauteren, Jan Deprest, Sebastien Ourselin, Kathleen Denis, Emmanuel Vander Poorten	Original research - engineering design plus bench characterisation and mixed‑reality simulator comparative study (within‑subject)	Foetal surgery (foetoscopic laser for twin‑to‑twin transfusion syndrome)	Endoscopic laser ablation tasks (selective lasering and line lasering) simulated for TTTS	Handheld active add‑on control unit mounted on Karl Storz FLEX‑X2S flexible ureteroscope (active flexible fetoscope prototype)	University laboratory mixed‑reality surgical trainer with force‑sensing body wall phantom and electromagnetic tracking	Not reported	Five novices without surgical expertise tested both instruments sequentially (active fetoscope first, then FLEX‑X2S), training performed, last six trials per instrument analysed, no randomisation or blinding reported	Not applicable (preclinical bench/simulator study)	Low (proof‑of‑concept with small N, simulator only, non‑randomised order)	Potential order/learning effects, small sample size, novice users not surgeons, added device mass confounds vertical force, no blinding, lab setting limits generalisability	5	Belgium	NA	Yes	NA	NA	One‑handed thumb‑operated scroll wheel, unidirectional bending, lightweight add‑on, rigid shaft sleeve, active closed‑loop control	During phases 2–3 of each of six analysed trials per instrument per participant after training (per‑trial recording during selective lasering and line lasering)	Vertical force maximum = peak z‑axis force on body wall, Vertical force integral = time integral of z‑axis force, Planar force maximum = peak resultant force in x‑y plane, Planar force integral = time integral of planar force, Flexible tip actuation = integral of absolute derivative of bending angle (how often/how much the tip was actuated), Coagulation accuracy = correlation coefficient versus i…	Forces in N, force integrals in N·s, flexible tip actuation in degrees (aggregate), time in seconds, coagulation accuracy unitless correlation coefficient	5 in active fetoscope condition and the same 5 in FLEX‑X2S condition (within‑subject, fixed order)	LEX‑X2S: Vertical force max 20.65 N (IQR 2.18), Vertical force integral 762.65 N·s (IQR 657.20), Planar force max 3.90 N (IQR 1.77), Planar force integral 68.42 N·s (IQR 56.00), Coagulation accuracy 0.75 (IQR 0.08), Time 120.50 s (IQR 70.00), Flexible tip actuation 43.91 deg (IQR 43.30) | Active fetoscope: Vertical force max 27.74 N (IQR 7.09), Vertical force integral 1345.62 N·s (IQR 1185.70), P…	Wilcoxon signed‑rank p‑values: vertical force max <0.001 (higher with active), vertical force integral <0.001 (higher with active), planar force max 0.014 (6.15% lower with active), coagulation accuracy 0.064 (ns), time 0.096 (ns), flexible tip actuation 0.104 (ns), planar force integral 0.391 (ns); no confidence intervals reported	Authors conclude the handheld active add‑on enables single‑handed, more stable and precise tip actuation and significantly reduces maximum planar force by 6.15% versus the native FLEX‑X2S, which could lower iPPROM risk in TTTS; vertical forces increased due to added mass; controller/hysteresis compensation and expert validation are needed before clinical use	Belgian FWO SB/1S98418N and SB/1S63117N, Wellcome Trust WT101957, EPSRC NS/A000027/1, PRESLICE C22/16/015 (internal KU Leuven grant).
Assessment of Laparoscopic Skills Performance: 2D Versus 3D Vision and Classic Instrument Versus New handheld Robotic Device for Laparoscopy.	Mariana Leite, Ana F. Carvalho, Patrício Costa, Ricardo Pereira, Antonio Moreira, Nuno Rodrigues, Sara Laureano, Jorge Correia-Pinto, João L. Vilaça, Pedro Leão	Prospective experimental laboratory (within-subject cross-over) study; randomised order of task and instrument/vision conditions	General/minimally invasive surgery training	Simulated laparoscopic skills tasks (Peg transfer, Wire chaser 1-hand and 2-hands, Knot tying) on box trainer	New handheld Robotic Device for Laparoscopy (HHRDL, University of Minho / IPCA prototype)	Life and Health Sciences Research Institute (ICVS), School of Health Sciences, University of Minho, Portugal	Single-session experimental trials per participant (≤10 min per task)	26 participants (15 naïve <50 laparoscopic cases; 11 experts ≥50 cases); right-hand dominant; excluded strabismus; performed all four conditions (2D/3D × classic/HHRDL) in random order	Not applicable (simulation study)	Fair - well-described methods but small sample and no blinding	Selection bias (right-hand only, volunteers); learning and fatigue effects; device ergonomics differences may confound; no blinding	26	Portugal	Yes	Yes	69.23 % more functional. 46.15 % found commands difficult. 80.77 % handle less comfortable; 88.47 % weight uncomfortable. HHRDL seen as most useful for Knot task (65.38 %). 65.39 % found 3D easier; 30.77 % 2D easier; 3.8 % no difference	NA	Weight 730 g, joystick control, battery operation, 6 DOF motion range	Single session with four conditions (2D/3D × classic/HHRDL) per task	Performance = task completion time (seconds); Peg transfer also included error counts (objects dropped, wrong instrument, untransferred items)	Seconds (time); counts (errors)	Naïve n = 15; Expert n = 11; each performed all conditions	Naïve: Peg transfer 2D-Classic 315.9 s → 3D-Classic 258.3 s | 2D-HHRDL 348.4 s → 3D-HHRDL 238.7 s. Wire Chaser 2-hands 2D-Classic 159.3 s → 3D-Classic 147.1 s | 2D-HHRDL 193.9 s → 3D-HHRDL 142.4 s. Knot 2D-Classic 300.6 s → 3D-Classic 261.5 s | 2D-HHRDL 276.8 s → 3D-HHRDL 162.8 s. Expert: Peg transfer 2D-Classic 207.6 s → 3D-Classic 192.7 s | 2D-HHRDL 258.2 s → 3D-HHRDL 243.8 s. Wire Chaser 1-han…	One-way ANOVA results: Group F(1, 384)=60.5, p < .001, η² = .136; Task F(3, 384)=47.8, p < .001, η² = .272; Video system F(1, 384)=3.47, p = .063; Instrument F(1, 384)=14.0, p < .001, η² = .035; Group × Task F(3, 384)=5.50, p = .001; Task × Instrument F(3, 384)=5.97, p = .001	HHRDL improves execution of difficult laparoscopic tasks (e.g., knot tying), particularly for novices; 3D vision enhances performance for inexperienced participants but offers little benefit for experienced surgeons; ergonomic design still needs improvement	No financial support reported (“The authors received no financial support for the research, authorship, and/or publication of this article.”)
The efficacy of robotic driven handheld instruments for the acquisition of basic laparoscopic suturing skills.	Ignacio Zapardiel, Alicia Hernandez, Javier De Santiago	Prospective nonrandomised within-subject comparative simulation study (fixed order: standard instruments first then Kymerax)	Obstetrics & Gynaecology (gynaecologic laparoscopy training)	Basic laparoscopic suturing tasks on a pelvic trainer (needle loading, stitch placement across marked points, intracorporeal knot tying)	Kymerax™ robotic‑driven articulating handheld laparoscopic instrument (Terumo Europe N.V., Leuven, Belgium)	Laparoscopic skills laboratory at La Paz University Hospital, Madrid, Spain (pelvic trainer with integrated camera and two 5‑mm trocars)	Not stated (single‑session assessment per participant)	Convenience sample of 15 physicians (11 residents, 4 consultants) from one gynaecology department, grouped by prior laparoscopic experience (low n=6, medium n=5, high n=4), all completed both conditions in fixed sequence after an 8‑min device video and 4‑min familiarisation, each task repeated 3 times and timed by the same investigator	Not stated (clinical LOE not directly applicable to simulation; nonrandomised comparative data)	Low-moderate	Small single‑centre sample, no randomisation or blinding, fixed order causing learning/sequence effects, same rater timing tasks, brief familiarisation may disadvantage the device, limited statistical reporting and no confidence intervals	15	Spain	NA	Yes	NA	NA	Articulating tip, non‑heavy handle with three buttons controlling horizontal, vertical and rotation movements, plug‑in generator, compatible instruments (grasper, scissors, dissector)	Single session, each exercise repeated 3 times, means across 3 repetitions analysed for both conditions	Completion time for three tasks defined as follows - needle loading: completed when the needle was placed perpendicular to the closed instrument; stitch: completed when passed across two marked points; knot tying: completed when a double square knot plus two simple knots were tied;	Seconds	Within‑subject design, 15 performed both standard laparoscopy and Kymerax, experience strata: low n=6, medium n=5, high n=4;	Means ± SD (seconds) - Group 1 (low, n=6): Laparoscopy load 155±111, stitch 69±39, knot 396±171; Kymerax load 82±33, stitch 103±75, knot 387±107; Total time lap 621.2±280.3 vs Kymerax 573.5±178.5. Group 2 (medium, n=5): Laparoscopy load 76±24, stitch 60±8, knot 128±34; Kymerax load 63±42, stitch 103±68, knot 174±68; Total time lap 266.3±41.2 vs Kymerax 341.3±166.1. Group 3 (high, n=4): Laparoscop…	Total time (lap vs Kymerax) p‑values by experience group: Group 1 p=0.732 (−47.7 s, −8.3%), Group 2 p=0.439 (+75.0 s, +28.2%), Group 3 p=0.352 (+52.6 s, +54.1%); task‑level within‑group p‑values and confidence intervals not reported	Authors conclude robotic‑driven handheld instruments may help inexperienced physicians acquire basic laparoscopic suturing skills, with no benefit when prior laparoscopic experience is present, and suggest clinical evaluation in experienced surgeons	Not reported
Comparative Evaluation of Handheld Robot-Aided Intraocular Laser Surgery.	Sungwook Yang, Robert A. MacLachlan, Joseph N. Martel, Louis A. Lobes Jr., Cameron N. Riviere	Comparative preclinical laboratory experiment using open-sky and eye-phantom models	Ophthalmology (vitreoretinal surgery)	Intraocular laser photocoagulation with 532 nm Iridex Diolite via 23-gauge EndoProbe	Micron handheld micromanipulator (6-DOF) with ASAP optical tracking and hybrid visual servoing	Laboratory bench - stereomicroscope with dual CCD cameras; open-sky slide and constrained eye phantom	Not reported (single-session bench experiments)	No human/animal subjects - repeated bench trials; single operator; non-randomised, no blinding	preclinical / bench (no clinical level applicable)	Moderate; detailed methods and statistics but limited external validity	Single-operator, non-randomised, learning effects, calibration errors, actuator saturation, phantom generalisability	0 (bench model)	USA	NA	Yes	NA	NA	Handheld micromanipulator with depth-limiting axial control, workspace and null-position guidance cues, visual servoing	Single-session trials at repetition rates 0.5–2.5 Hz and targeting thresholds 30–200 µm	Targeting error = distance between burn centre and target; execution time = time to complete ring pattern	µm (error), s (time), Hz (repeat rate)	Not applicable (bench tests)	Open-sky task (Table I, p. 15) Automated: 0.5 Hz 31 µm, 1.0 Hz 33 µm, 1.5 Hz 39 µm, 2.0 Hz 36 µm, 2.5 Hz 48 µm Semiautomated: 0.5 Hz 39 µm, 1.0 Hz 39 µm, 1.5 Hz 68 µm, 2.0 Hz 105 µm Unaided: 0.5 Hz 80 µm, 1.0 Hz 82 µm, 1.5 Hz 105 µm, 2.0 Hz 111 µm, 2.5 Hz 142 µm Eye-phantom task (Table II, p. 16) Automated: 0.5 Hz 43 µm, 1.0 Hz 45 µm, 2.0 Hz 53 µm Semiautomated: 0.5 Hz 45 µm, 1.0 Hz 61 µm Unaided…	Automated vs Unaided significant across all open-sky rates (p < 1×10⁻²⁰); Semi vs Unaided often significant (p < 1×10⁻¹⁰ at 0.5 Hz); Automated vs Semi significant at higher rates (p < 1×10⁻² to 1×10⁻¹⁰)	Hybrid visual-servo control with depth limiting improved accuracy; automated Micron operation significantly reduced targeting error versus unaided manual performance, especially in open-sky tests; semiautomated gains smaller and not significant in constrained eye-phantom; further ex vivo/in vivo studies planned	U.S. National Institutes of Health (R01EB000526); Kwanjeong Educational Foundation
Manipulator Design and Operation for a Six-Degree-of-Freedom Handheld Tremor-Canceling Microsurgical Instrument.	Sungwook Yang, Robert A. MacLachla, Cameron N. Riviere	Device development with benchtop tests plus single‑subject handheld pre/post evaluation	Ophthalmology - vitreoretinal microsurgery	No clinical intervention - simulated microsurgical tasks (pointing, circle tracing)	Micron (6‑DOF handheld tremor‑cancelling micromanipulator)	Laboratory (Robotics Institute, Carnegie Mellon University) under surgical microscope	NR (single‑session lab experiments; per‑trial durations reported)	Single subject (non‑surgeon), IRB‑approved	N/A (preclinical/engineering study)	Low for human‑factors evidence (n=1)	Single subject; no blinding; manual vs automated speed differences; authors/device‑developer involvement	1	USA	NA	Yes	NA	NA	Instrument: ergonomic handle; total weight 70 g; overall Ø28.5×126 mm; micromanipulator Ø23×37 mm; 6 DOF; optical tracking; RCM	Pointing: 20 s per trial, 5 trials per condition; Circle tracing: diameters 1–4 mm at 1–5 mm/s, 5 trials; Positioning/side‑load tests as specified	RMS error vs mean position (pointing) and vs planned trajectory (circle tracing); maximum error; RMS error vs sinusoidal target under side load	μm (errors); N (side‑load); mm/s (velocity)	Pointing OFF vs ON: n=1 each (5 trials/condition); Circle manual vs automated: n=1 each (5 trials/condition)	Pointing RMS error 112±8 μm (OFF) vs 12±2 μm (ON); max error 361 μm (OFF) vs 49 μm (ON). Circle‑tracing RMS error 10–20 μm (automated) vs 105–140 μm (manual); manual speed ~0.3–0.4 mm/s vs automated 1–5 mm/s	RMS error p=3×10⁻⁹; max error p=7×10⁻⁶	6‑DOF Micron provides larger range of motion, can impose an RCM, tolerates up to 0.25 N side load, and reduces tremor by ~89% in a handheld pointing task; further ex vivo/in vivo testing planned	U.S. NIH R01EB007969 and R01EB000526; Kwanjeong Educational Foundation
Fiber-optic OCT sensor guided "SMART" micro-forceps for microsurgery.	Cheol Song, Dong Yong Park, Peter L. Gehlbach, Seong Jin Park, Jin U. Kang	Proof-of-concept experimental bench and biological phantom evaluation comparing freehand versus SMART-assisted use	Ophthalmology - vitreoretinal microsurgery	Micro-forceps grasping and membrane peeling tasks (simulated)	SMART micro-forceps (handheld, CP SS-OCT–guided, piezoelectric motor–actuated, modified Alcon forceps)	Laboratory/bench-top using dry phantom (white paper) and biological tissue model (egg shell membrane)	Not reported	Not applicable - bench testing with one retina surgeon and small number of trials	Not applicable (preclinical engineering/bench study)	Exploratory prototype evaluation; limited replicates; lacks clinical data	Single operator; small number of trials; no blinding or randomisation; possible learning and order effects	0 (phantom and biological models; operator count not specified)	United States and Korea	NA	Yes	NA	NA	Handheld design, asymmetric finger configuration for height correction, OCT-based distance sensing, and piezoelectric motor tremor compensation	Two 10-second grasp trials from 1000 µm offset; SMART grasps of 1 s and 5 s repeated every 5 s; continuous 10 s grasp; peeling from 500 µm offset	Tool-tip displacement and stability relative to target surface; Root Mean Square Error (RMSE) of tool height; spectral amplitude of tremor frequency bands	Micrometres (µm) for RMSE/displacement; decibels (dB) for spectral amplitude	Not applicable (within-operator comparison: freehand vs SMART-assisted)	RMSE (freehand): 323.53 µm RMSE (SMART-assisted): 45.46 µm RMSE (fixed tool with compensation): 7.14 µm SMART grasp durations: 1 s = 52.45 µm; 5 s = 27.88 µm; 10 s = 22.59 µm Tip displacement: Freehand ~1000 µm; SMART-assisted <350 µm Frequency amplitude reduction: ~10 dB in low-frequency tremor band (0–5 Hz)	No statistical tests or confidence intervals reported; approximate RMSE improvement −278 µm (≈86% reduction)	Prototype SMART micro-forceps using CP-OCT sensing and piezoelectric actuation successfully suppresses hand tremor and stabilises the tool tip during grasping and peeling, potentially enhancing safety, efficiency, and microsurgical performance.	U.S. National Institutes of Health/National Eye Institute (R01EY021540-01A1); Research to Prevent Blindness (RPB); National Research Foundation of Korea (MSIP, No. 2011-0030075)
A novel handheld robotic-assisted system for unicompartmental knee arthroplasty: surgical technique and early survivorship	Andrew K. Battenberg, Nathan A. Netravali, Jess H. Lonner	Retrospective, multi-centre, single-arm cohort study (original data, non-comparative)	Orthopaedic surgery - knee arthroplasty	Unicompartmental knee arthroplasty (UKA)	NAVIO™ System (Smith & Nephew) - handheld semi-autonomous robotic handpiece with haptic boundary (exposure/speed control) and infrared tracking	5 clinical sites in the United States	Mean follow-up 2.3 years with a 2‑year (96‑week) survivorship endpoint (surgery dates not reported)	Consecutive initial NAVIO-assisted UKA cases performed by five surgeons to reduce selection bias; survivorship/adverse events captured prospectively if 2‑year visit not yet completed, otherwise retrospectively; no randomisation or comparator	Level IV (therapeutic - case series/poor-quality cohort, non-comparative)	Fair (predefined endpoint, multicentre N=128, but non-comparative, short follow-up, industry-funded)	Potential selection bias mitigated by including each surgeon’s initial cases; lack of comparator; short-term follow-up; industry funding and author conflicts of interest; survivorship benchmarked to registry (historical) rather than concurrent control	128	United States	NA	NA	NA	NA	NA	2 years (96 weeks) primary endpoint	Implant survivorship defined as freedom from revision for any reason	Percentage (Kaplan–Meier survivorship) with 95% CI	NAVIO UKA: n=128 (single group)	NAVIO UKA summary: 2‑year survivorship 99.2% (95% CI 94.6–99.9%); 1 revision at 218 days for persistent soft-tissue pain; adverse events possibly/definitely related to NAVIO 4/128 (3.1%); to implant 16/128 (12.5%); demographics - mean age 64.7 years, 57.8% male, mean BMI 30.3 kg/m²; compartment treated: medial 124 (96.9%), lateral 4 (3.1%)	Estimate vs historical control: 2‑year survivorship 99.2% (95% CI 94.6–99.9%), reported as non‑inferior to registry reference of 95.7% with δ=7%; p‑value not reported	Authors conclude NAVIO handheld robotic-assisted UKA shows high short‑term survivorship, potentially exceeding early registry/cohort results; longer follow‑up needed to confirm durability	Funded by Smith & Nephew; one author is a company employee and another reports consultancy/royalties (conflicts disclosed)
Automatic bone drilling in hip fractures osteosynthesis	Tony Boiadjiev, George Boiadjiev, Kamen Delchev, Ivan Chavdarov, Rumen Kastelov	Preclinical laboratory/engineering study using ex vivo porcine femora; algorithm development and bench testing	Orthopaedic trauma (hip fractures)	Osteosynthesis of proximal femur fractures via automated drilling through femoral neck and head	ODRO (Orthopaedic bone Drilling Robot), handheld robotic drilling system	Laboratory bench study, Bulgarian Academy of Sciences (Sofia)	Not reported	Porcine femur bones acquired from licensed retail meat stores; no randomisation or groups	Not applicable (preclinical)	Low; proof-of-concept preclinical design, limited validation	Developer involvement; no blinding; minimal statistical analysis; unspecified sample size	0 human participants (number of bone specimens not reported)	Bulgaria	NA	NA	NA	NA	NA	During and after each drilling experiment	Successful far cortex detection (hip head cortex registration) without joint penetration	mm (hole depth), N (force), mm/s (feed speed), AU (arbitrary time units)	Not applicable	Not applicable	Not applicable	The ODRO robot can automatically perform bone drilling for hip fracture osteosynthesis without X-ray guidance, achieving the deepest safe hole without joint penetration and displaying hole depth with 0.1 mm accuracy; may support minimally invasive surgery and faster recovery	Not reported
Concept and design of a handheld mobile robot system for craniotomy	Gavin J. Kane	Preclinical engineering evaluation on phantoms (offline laser-scan accuracy and online system logging)	Neurosurgery/Craniofacial	Craniotomy (planned trajectory skull cutting)	Craniostar handheld mobile robot (up to 4 DOF)	Laboratory / phantom experiments using optical tracking and laser scanning	Not specified	None (no human participants)	Not applicable (preclinical)	Descriptive engineering evaluation	No control group, manual placement errors, potential registration/tracking misalignment	0 (phantom testing only; surgeon feedback qualitative)	Germany	NA	Yes	NA	NA	handheld 800 g body, two active drive wheels, detachable sterilisable section, integrated GUI, safety watchdog, traction hook under skull	During simulated cutting and post-cut assessment	Accuracy of cut vs planned trajectory	Millimetres; % of trajectory points within tolerance	N/A (single prototype)	Flat wood: 97.2 % ≤ ±0.5 mm; 100 % ≤ ±1 mm Plastic phantom skull: 95–97 % ≤ ±0.5 mm; 100 % ≤ ±1 mm Complete simulated procedures: often < 75 % ≤ ±1 mm (sometimes < 60 %) due to re-registration error Online logs: ±0.5 mm for > 95–99 % of early segments	None reported	Robot achieved ~ ±0.5 mm trajectory accuracy in most tests; reduced accuracy over full trajectories was due to optical tracking/re-registration, not control error; suitable for integration into surgical workflow; future optimisation and clinical validation recommended.	EU Marie Curie Actions / COMPU-SURGE project (KIT, Germany)
Toward active tremor canceling in handheld microsurgical instruments	Cameron N. Riviere, Wei Tech Ang, Pradeep K. Khosla	Preclinical engineering feasibility study with benchtop preliminary evaluation	Microsurgery (ophthalmology focus - vitreoretinal)	Microsurgical manipulation with active tremor suppression	Handheld electromechanical microsurgical instrument with active tremor cancellation	Robotics Institute, Carnegie Mellon University, Pittsburgh, USA (laboratory)	Not reported	Not applicable (benchtop/instrument study)	Not applicable	Not graded (engineering proof-of-concept)	Not reported	Not applicable	USA	NA	Yes	NA	NA	Natural handheld interface; active tremor suppression; high-bandwidth human–robot hybrid manipulation	Not applicable	Accuracy enhancement by cancellation of tremor and undesired motion	Micrometre-scale accuracy (qualitative, not quantified)	Not applicable	Preliminary instrument performance description only	Not reported	A fully handheld instrument that senses its own movement and actively compensates for tremor can enhance microsurgical accuracy while preserving the surgeon’s natural hand control; feasibility demonstrated in preliminary results	National Institutes of Health (R01 EB000526, R21 RR13383); R. Green Annan Fund; Lettie B. Trognitz Fund of The Pittsburgh Foundation; National Science Foundation (EEC-9731748); Johnson & Johnson Focused Giving Program
handheld robotic instrument for dextrous laparoscopic interventions	Marco Piccigallo, Francesco Focacci, Oliver Tonet, Giuseppe Megali, Claudio Quaglia, Paolo Dario	Prototype development with within-subject simulator-based performance evaluation (four control modes)	Minimally invasive surgery – laparoscopy	Intracorporeal suturing/knot-tying (simulated)	Custom handheld robotic instrument with 3-DOF roll–pitch–roll cable-driven wrist and motorised grasper	University laboratory (virtual-reality simulator and box-trainer)	Not specified (single-session assessments only)	Convenience sample of 2 expert laparoscopic surgeons (each tested all 4 control modes)	V (engineering/simulator, non-clinical)	Very low (formative prototype test, no randomisation or statistics)	Selection and performance bias; minimal replication; no statistical analysis; limited generalisability	2 surgeons	Italy	NA	Yes	NA	NA	Cylindrical handle; yaw–pitch control with roll switch; thumb-actuated grasp; tendon–sheath to remote motors; ~300 g device weight	Single immediate test per control mode per participant	Time to complete a 100-point knot-tying trajectory on simulator	Seconds	n = 2 each (HA, HR, TA, TR control modes)	Graph (Fig. 7): fastest performance with HA (handle-absolute) mode; ≈ 55 s completion time	Not reported (no statistical testing)	Prototype with roll–pitch–roll wrist and yaw–pitch handle + roll switch was intuitive; surgeons completed the simulated knot-tying in ≈ 55 s; tendon–sheath hysteresis causes inaccuracy, suggesting future designs mount motors directly on the instrument despite weight increase	FIRB-2001 ApprEndo (Project RBNE013TYM) and EndoCAS Centre of Excellence (COFINLAB-2001 CLAB01PALK), funded by MIUR (Italian Ministry of Education, University and Research)
A handheld device with 3-DOF haptic feedback mechanism for microsurgery	Wang Z, Wang S, Zuo S;	Device development with bench calibration plus 4‑participant haptic‑perception study and single‑subject membrane‑peeling phantom (feedback on vs off); Ophthalmology - retinal microsurgery (microsurgery focus)	Ophthalmology - retinal microsurgery (microsurgery focus)	Membrane peeling (egg inner shell membrane phantom as surrogate for retinal membrane peeling)	Prototype hand‑held 3‑DOF haptic‑feedback microsurgical device with fibre Bragg grating force sensing and motorised tactile feedback	University laboratory (bench tests, user trials, egg‑membrane phantom), non‑clinical	Not reported	Four right‑handed participants for perception test (recruitment not stated; all completed all conditions with randomised force order and sensory masking); single nonsurgeon subject for phantom (within‑subject feedback on vs off; order not specified)	Not applicable for clinical LOE (engineering feasibility; approx. Level V if mapped)	Low (proof‑of‑concept lab study)	Small convenience samples, single‑subject phantom, no clinical participants, no randomisation for phantom, no blinding beyond sensory masking, potential learning/order effects, no inferential statistics	5 total (4 user‑study + 1 phantom)	China	NA	Yes	NA	NA	Haptic feedback via two motor‑driven rotating coarse‑surface discs (for F_x and F_y) and a linear‑motor index‑finger block (for F_z); feedback threshold 3.5 mN; elements placed at the “tiger mouth” and index finger’s third joint to minimize interference with manipulation	Perception test: 10 trials per P level (5 per axis) with forces 4–10 mN in 1 mN steps; Phantom: two trial sets with feedback off and on, forces recorded continuously over seconds‑scale tasks	Perception outcomes = correct identification of direction and relative magnitude vs 7 mN reference; Phantom outcomes = mean ± RMS and maximum F_x, F_y, and resultant F_t at the tip	mN (forces), % (correct rates), rpm (motor input)	Perception: 4 participants completed all P levels (within‑subject); Phantom: same single participant performed both conditions (within‑subject; effectively n=1 per state)	Phantom Set 1: off - F_t mean 5.28 ± 3.38, max 16.66; on - F_t mean 4.09 ± 2.32, max 10.48. Phantom Set 2: off - F_t mean 6.67 ± 2.42, max 17.82; on - F_t mean 3.69 ± 1.63, max 11.42. (Component axes: Set 1 off F_x 1.93 ± 1.55, F_y 4.78 ± 3.27; on F_x 2.01 ± 1.15, F_y 3.83 ± 2.02. Set 2 off F_x 0.52 ± 0.55, F_y 6.65 ± 4.33; on F_x 3.24 ± 1.23, F_y 3.68 ± 2.36)	No inferential statistics reported; approximate mean F_t reduction with feedback: Set 1 −1.19 mN (−22.5%), Set 2 −2.98 mN (−44.7%)	Authors conclude the device can measure 3‑DOF forces at the millinewton level, haptic feedback conveys magnitude and direction and reduces transverse forces in phantom, and the compact, low‑cost design could fit real‑time microsurgical workflows	National Natural Science Foundation of China (61773280) and Tianjin Municipal Science and Technology Department Program (16JCYBJC40700).
Design and implementation of a handheld robot-assisted minimally invasive surgical device with enhanced intuitive manipulability and stable grip force	Yingkan Yang, Kang Kong, Jianmin Li, Shuxin Wang	Original engineering study with device design, bench testing, simulated suture task, and preclinical animal experiments, non‑comparative	General surgery (laparoscopic gastrointestinal and hepatobiliary)	Laparoscopic gastrointestinal anastomosis, cholecystectomy, appendectomy, perforation repair, partial hepatectomy in animal models	Prototype hand‑held robot‑assisted MIS device (Tianjin University) with needle driver, tissue forceps, electric hook	Bench laboratory and laparoscopic simulator, plus animal operating theatre at Third Xiangya Hospital of Central South University, China	2016–2019 preclinical programme	One surgeon with laparoscopic experience invited, ~20 min familiarisation, >20 pig procedures, no randomisation or allocation details reported	Not applicable (preclinical, no clinical participants)	Proof‑of‑concept, non‑comparative, limited sample reporting, no statistical testing	Inventor authorship, single operator, no blinding, incomplete reporting of animal numbers	0 humans, >20 animals, 1 surgeon operator	China	Yes	Yes	Surgeon reported handle more comfortable than a conventional instrument and a short learning curve (operable after ~20 min)	NA	Quick‑change mechanism, 3‑DOF wrist (roll, pitch, distal roll), handle sensors with motorised drive	Bench: 54 opening‑angle combinations measured 5 times each; simulated suture: 20 sampling points across wrist movement; animal operations: intraoperative only	Opening‑angle error = measured minus preset gripper angle; grip force = Flexiforce sensor reading during clamping; stability = range of grip forces across wrist movement; animal success = completion of laparoscopic tasks	Degrees (°), Newtons (N), mN·m (motor torque)	N/A (no intervention groups)	Without compensation: grip force 11.1–16.8 N; with compensation: 15.2–15.9 N; overall mean grip force 15.62 N; maximum mean 20.32 N; minimum mean 11.78 N; maximum opening‑angle error 1.2°	Not reported	Device provided intuitive manipulation and stable operation; pre‑compensation produced consistent grip force; animal procedures completed successfully; handle comfort judged better than conventional instrument	National Key R&D Program of China (2019YFB1311502) and National Natural Science Foundation of China (51805362, 51875394).
Design and Evaluation of a Dexterous and Modular handheld Surgical Robot for Minimally Invasive Surgery	Yingkan Yang; Kang Kong; Jianmin Li; Shuxin Wang; Jinhua Li	Prototype development and preclinical evaluation – bench and simulation testing plus animal feasibility procedure	General surgery/laparoscopy	Running suturing and helix-trajectory tracking tasks; gastrointestinal anastomosis in pig	Dexterous and modular handheld surgical robot with roll-yaw-roll wrist	University laboratory and animal operating theatre (Third Xiangya Hospital, Central South University, China)	Not reported (single-session human tests and one animal procedure)	Five novice, right-hand-dominant volunteers without laparoscopy experience from Tianjin University; within-subject comparison (robot vs conventional instrument)	Preclinical experimental (no clinical patients)	Exploratory, small sample, single-session simulation and animal test	Developer involvement; no randomisation or blinding; learning/order effects	5 human subjects (+ 1 animal procedure)	China	Yes	Yes	Handle comfortable; slight fatigue after > 1 h due to weight; aseptic bag on handle slippery reducing grip comfort	NA	Cylindrical joystick, independent joints, thumb–index grip, wrist yaw control, quick magnetic connection, interchangeable instruments, sterilisable mechanical design	Single testing session per participant; five trials per task; ~20 min training + 4 min task limit	– Helix-tracking accuracy (deviation mm) – Repeatability & reproducibility errors (mm) – Hexagonal suturing quantity (0–12), quality (0–4), global skill (0–48) – Grip force range (N)	mm; N; points; minutes	5 robot condition/5 conventional condition (within-subject)	Helix-tracking accuracy: 4.22 ± 0.33 mm (robot) vs 4.81 ± 0.37 mm (conventional) Reproducibility error: 0.25 ± 0.04 mm (robot) vs 0.27 ± 0.06 mm (conventional) Suturing global skill: 28.8 ± 5.02 (robot) vs 17.2 ± 7.43 (conventional) Quantity: 10.4 ± 1.67 vs 7.6 ± 1.67 Quality: 2.8 ± 0.45 vs 2.2 ± 0.45 Grip force range: 8.63 – 19.18 N	Global skill p = 0.041; Quantity p = 0.034; Quality p = 0.083	handheld robot improved dexterity and accuracy compared with a conventional instrument; feasible for animal gastrointestinal anastomosis; further development needed to reduce weight, improve handle grip, and add force feedback	National Natural Science Foundation of China (51475323, 51520105006); National Key R&D Program of China (2017YFC0110401)
A Smart Haptic handheld Device for Neurosurgical Microdissection	Christopher J. Payne; Hani J. Marcus; Guang-Zhong Yang	preclinical experimental evaluation – device calibration plus two randomised within-subject psychophysical user studies (with vs without vibrotactile feedback) and a cadaveric pilot study	Neurosurgery (microneurosurgery)	Microdissection of the Sylvian fissure on a cadaver head (plus simulated retraction and force-matching tasks)	Smart Haptic handheld Dissector – custom blunt dissector with 2-DoF strain-gauge force sensing and 250 Hz vibrotactile feedback	Laboratory optical-table setup and cadaveric operating lab at Imperial College London	Retraction – 60 s per trial × 6 trials; Intervening-force – 3 phases of 6 s each; Cadaveric – 12 min total	Volunteers (clinically inexperienced, right-handed): n = 10 per user study (4 F/6 M, aged 21–33). Within-subject randomised order (3 runs with feedback / 3 runs without). Cadaveric procedure by one neurosurgical resident	Not applicable (preclinical)	Low (small samples, short exposure, single operator)	Convenience sampling, potential learning effect, limited external validity	10 + 10 volunteers + 1 resident	United Kingdom	NA	Yes	NA	NA	Compact handheld form, spring-damper vibrotactile actuator, force threshold at 0.3 N (limit alert)	Continuous force sampling (40–100 Hz) over each run (60 s or 12 min)	Force reduction and consistency improvement under feedback	Newtons (N), seconds (s), percent (%)	Within-subject (each participant experienced both conditions – 3 runs with feedback, 3 without)	Retraction (n = 10): Max 0.505 vs 0.357 N; Median 0.254 vs 0.235 N; IQR 0.057 vs 0.035 N; Time > 0.3 N 4.69 s vs 0.05 s; Time < 0.2 N 2.18 s vs 4.18 s. Intervening-force (n = 10): Max 0.799 vs 0.403 N; Median 0.380 vs 0.274 N; IQR 0.150 vs 0.031 N. Cadaveric (resident): Max 0.963 vs 0.779 N; Median 0.063 vs 0.038 N; IQR 0.159 vs 0.062 N; Time > 0.3 N 41.49 s vs 8.31 s (11.53% vs 2.31%)	Retraction study: p < 0.001 (for total force distribution, max per run, and time > 0.3 N); p = 0.085 (time < 0.2 N). Intervening-force study: p < 0.001 (for total force distribution). Cadaveric study: p < 0.001 (for total force distribution)	A compact, low-cost vibrotactile force-threshold integrated into a handheld microsurgical instrument significantly reduced applied forces and force variability in both simulated and cadaveric microneurosurgical tasks, providing real-time haptic feedback without interfering with manipulation.	Wates Foundation Fellowship; Wellcome Trust Medical Engineering Centre of Excellence Grant; Wellcome Trust Clinical Fellowship
Design and Control of a handheld Concentric Tube Robot for Minimally Invasive Surgery	Cédric Girerd, Tania K. Morimoto	Prospective engineering evaluation with bench experiments plus preliminary user study (simulated), single‑arm	General surgery (MIS)	Percutaneous abscess drainage (simulated task)	Hand‑held concentric tube robot (3‑tube CTR, 6‑DOF) with handle‑integrated trackball and buttons;	Laboratory bench‑top (UC San Diego)	Not reported (single‑session tasks per operator lasting ~75–114 s)	Five first‑time operators with no surgical experience	Not applicable (preclinical engineering study)	Low	Small sample, non‑surgeon participants, single‑site simulation, potential learning effects, no control group/blinding	5	USA	Yes	Yes	Users perceived device to be “lightweight”	NA	Handle‑integrated UI, compact lightweight form factor, distal dexterity (bendable CTR) facilitating combined rigid‑body and tip motions	Single session per participant; continuous tracking during one navigation sequence hitting 5 targets	Path‑following error (distance between CTR tip trajectory and desired path), final tip error at target contact, completion time, rigid‑body vs UI interaction patterns	mm, mm/s, seconds	N/A (single arm - no comparator)	User study performance: average completion time 87 s (range 75–114); human‑in‑the‑loop path‑following error - Path 1: mean 1.3 mm (SD 0.9, max 3.9), final tip error 0.7 mm; Path 2: mean 0.3 mm (SD 0.6, max 2.1), final tip error 0.9 mm	No inferential statistics (no CIs/p‑values) reported	Authors conclude the hand‑held CTR achieves accuracy suitable for percutaneous abscess drainage and that combining rigid‑body motion with precise tip control improves efficiency, helping bridge the gap between manual tools and grounded robots	National Science Foundation (Grant 1850400).
Hybrid-Structure handheld Robotic Endoscope for Sinus Surgery With Enhanced Distal Dexterity	Xuchen Wang, Junyan Yan, Xin Ma, Jason Y.K. Chan, Russell H. Taylor, Shing Shin Cheng, Kwok Wai Samuel Au	Preclinical benchtop/phantom experiments plus within‑subject cross-over user study (HHRE vs robot‑arm‑assisted HHRE)	Otorhinolaryngology (rhinology)	Diagnostic sinus inspection in a maxillary‑sinus phantom (navigation/visualisation tasks)	Hybrid‑Structure Hand‑Held Robotic Endoscope (HHRE), with and without robot‑arm assistance (gravity compensation)	Laboratory setting using a 3‑D printed PHACON SN‑as maxillary‑sinus model at CUHK	Not reported (per participant: ~5‑min training per modality + three 10‑min target‑viewing tasks per modality)	Convenience sample, n=10 (2 with surgical background, 8 engineering; age 23–33), all completed both modalities; allocation/order not reported	Not applicable (preclinical engineering/phantom study)	Fair (small convenience sample; phantom‑based; limited reporting of randomisation/statistics)	Selection bias; possible order/learning effects; self‑reported outcomes; mixed participant backgrounds; nonparametric test choice for paired data (Mann–Whitney) noted	10	Hong Kong SAR, China	Yes	Yes	NASA‑TLX (overall and subscales: mental, physical, temporal demand; performance; effort; frustration)	NA	Gravity compensation to minimize fatigue; high torsional stiffness to reduce view rotation; compact hand‑held form factor; articulated wrist; proximal flexible section	Post‑task (after each 10‑min task)	NASA‑TLX; analysis: Mann–Whitney U on non‑normal data	NASA‑TLX 0–10 scale in 0.5 increments (0 = very low/perfect; 10 = very high/failure)	HHRE n=10; robot‑arm‑assisted HHRE n=10 (within‑subject)	See boxplot (Figure 11)	Mental and physical demand significantly lower with robot‑arm‑assisted HHRE vs HHRE alone (Mann–Whitney U, p<0.05); temporal demand, effort, frustration also lower; performance not significantly different (p>0.05)	HHRE increases distal dexterity and torsional stiffness and reduces occupied motion space; achieves up to 94.2% visual coverage in maxillary sinus phantom; robot‑arm assistance reduces user workload and improves usability in tasks	Chow Yuk Ho Technology Centre of Innovative Medicine (CUHK); Multiscale Medical Robotics Centre, InnoHK; RGC grant 14209719
handheld Bone Cutting Tool With Autonomous Penetration Detection for Spinal Surgery	Takayuki Osa, Christian Farid Abawi, Naohiko Sugita, Hirotaka Chikuda, Shurei Sugita, Takeyuki Tanaka, Hirofumi Oshima, Toru Moro, Sakae Tanaka, Mamoru Mitsuishi	Engineering development with bench experiments (motorised and handheld setup)	Orthopaedic (spinal surgery)	Spinal bone cutting/fenestration	handheld bone cutting tool with autonomous penetration detection	Laboratory bench testing	Not reported	No human participants (device evaluation only)	Not applicable	Not applicable	Not assessable (engineering validation study)	0	Japan and Germany	NA	NA	NA	NA	NA	Not applicable	Detection of bone penetration and automatic stop before total penetration	Not reported	Not applicable	Not applicable	Not applicable	The prototype handheld tool learned cutting and motion states from surgeon demonstrations and successfully detected penetration, stopping actuation before full penetration.	JSPS Grant-in-Aid for Scientific Research (S) 23226006 and JSPS Fellows 25-7106
Method for Extracting Intentional Motion Using Force Sensor in handheld Robotic Forceps and Its Effect on Performance	Toshihiro Kawase, Tetsuro Miyazaki, Kenji Kawashima	Laboratory experimental within‑subject cross-over (UIA on vs off) using simulated grasp‑and‑reach task	Laparoscopic/minimally invasive surgery (general)	Simulated instrument manipulation task (virtual grasp‑and‑reach) rather than clinical surgery	Hand‑held robotic forceps with 2‑DoF flexible joint and gripper, force‑sensor input, Unintended Input Attenuator (UIA) “soft clutch”	University laboratory simulation (Tokyo Denki University/The University of Tokyo)	Single session per participant, exact duration not reported	Two participants, recruitment not described, within‑subject testing of both conditions, order of UIA use counterbalanced between participants, target size/distance conditions randomised, participants not told which UIA condition was set	Not applicable (nonclinical engineering experiment)	Low	Very small sample, convenience sampling, limited randomisation, potential learning/fatigue effects, unclear blinding of experimenters, no sample‑size justification	2	Japan	NA	Yes	NA	NA	Handle with force‑sensor‑mounted input device pinched by thumb and index finger, fulcrum placement to reduce unintended gripper effects, pneumatic actuation, foot pedal clutch and active motion transformation available but not used during experiments	Outcomes recorded continuously per trial within a single session, no follow‑up	Throughput = IDe divided by MT where IDe = log2(D/We + 1) and We = 4.133 × SDx	bits/s for throughput, seconds for movement time, bits for IDe, degrees for joint angles (illustrative traces)	UIA on: 2, UIA off: 2 (within‑subject)	Participant A throughput without UIA 0.47 ± 0.17 bits/s, with UIA 0.94 ± 0.21; Participant B without UIA 0.58 ± 0.13, with UIA 0.87 ± 0.18; overall mean across two participants without UIA 0.525, with UIA 0.905	Higher throughput with UIA, paired t‑test p < 0.0001 for both participants, no confidence intervals reported	UIA attenuates unintended inputs during gripper operation and improved input‑device performance by ~1.5–2×, enabling faster operation, further validation in realistic surgical environments is needed	Not reported
Toward the Development of a handheld Surgical Robot for Laparoscopy	Ali Hassan Zahraee, Jamie Kyujin Paik, Jerome Szewczyk, Guillaume Morel	Engineering development study with virtual‑reality simulator evaluation (preclinical)	Laparoscopic/minimally invasive surgery	Laparoscopic suturing tasks and general laparoscopic interventions (simulated)	Hand‑held robotic laparoscopic instrument with two independent degrees of freedom and an ergonomic controller	Engineering laboratory and virtual‑reality simulator	Not reported	N/A	Not applicable (non‑clinical engineering study)	Not formally assessed	Developer‑led, simulator‑only evaluation with no controlled human study reported	Not reported	France and USA	NA	Yes	NA	NA	Two independent DOFs at the end‑effector, orientation controlled via ergonomic controller, different control modes evaluated	Not reported	Not reported	Not reported	Not applicable	Not applicable	Not applicable	The device provides two independent DOFs deemed sufficient to enable in‑vivo MIS suturing, control is described as intuitive and ergonomic, simulator evaluations informed the chosen design, and a proof‑of‑concept prototype was built	Agence Nationale de la Recherche (ANR), Grant ANR‑09‑CORD‑020.
Implant orientation accuracy of a handheld robotic partial knee replacement system over conventional technique in a cadaveric test	Rahul Khare, Branislav Jaramaz, Brian Hamlin, Kenneth L. Urish	Paired comparative cadaveric experimental study	Orthopaedic surgery – knee arthroplasty	Unicondylar knee arthroplasty (partial knee replacement)	Navio hand‑held robotic navigation system (Smith & Nephew), image‑free, optically tracked hand‑held drill with dynamic referencing	Cadaveric laboratory (pre‑ and postoperative CT assessment), USA	Not reported	Twelve hip‑to‑toe cadaveric specimens; two surgeons performed six specimens each; robotic UKA on one knee and conventional on the contralateral, sides balanced (3 left/3 right per surgeon); non‑randomised; blinding not reported	Not applicable (preclinical/cadaveric)	Moderate (paired within‑specimen control and objective measurements but small n, no randomisation/blinding, preclinical)	Industry involvement (two authors are Smith & Nephew employees; two are paid consultants); small sample; potential learning‑curve/performance bias	12 cadaveric specimens (24 knees)	USA	NA	Yes	NA	NA	Hand‑held, image‑free, optically tracked drill with dynamic referencing; smaller footprint and intended improved ergonomics	Preoperative CT planning and immediate postoperative CT; intraoperative optical measurements also captured in 11 robotic cases	Component orientation error (femoral flexion/extension, varus/valgus, internal/external rotation; tibial slope and varus) defined as angular deviation from planned/ideal positions	Degrees (°)	Robotic UKA: 12 knees for CT‑based analysis (11 for optical metrics); Conventional: 12 knees	Robotic (CT metrics) summary: Femoral flexion mean±SD 0.68±1.51°, varus 0.27±2.72°, rotation 0.38±1.90°; Tibial slope −0.21±2.68°, varus 0.08±2.31°; RMSEs respectively 1.60°, 2.61°, 1.86°; 2.58°, 2.22°. Conventional summary: Femoral flexion 0.27±7.85°, varus −1.64±6.30°, rotation −2.28±4.65°; Tibial slope 2.37±3.44°, varus 0.29±1.88°; RMSEs 7.52°, 6.25°, 5.00°; 4.06°, 1.80°. (All from Table 1, p.…	No between‑group p‑values or CIs were reported; descriptive RMSEs favour the hand‑held robot for femoral axes and tibial slope, while conventional had slightly lower tibial varus RMSE; no surgeon‑to‑surgeon difference (Mann–Whitney, p > .05)	The hand‑held robotic UKA system provides improved final implant orientation accuracy over a conventional manual approach; further clinical studies are needed	Smith & Nephew Inc. (article copyright holder; two authors are employees and two are paid consultants; manufacturer of Navio and Stride implants)
An Active Steering handheld Robotic System for Minimally Invasive Orthopaedic Surgery Using a Continuum Manipulator	Justin H. Ma, Shahriar Sefati, Russell H. Taylor, Mehran Armand	Laboratory experimental engineering evaluation (bench testing using simulated cancellous bone and bone phantom); no human participants	Orthopaedic surgery	Milling and curved drilling for minimally invasive orthopaedic interventions (simulated)	handheld robotic system with a cable-driven continuum dexterous manipulator (CDM) and flexible rotary cutting tool, optionally mountable to a positioning robot	Laboratory/bench-top environment (simulated surgical conditions)	Not reported	Not applicable (no human or animal participants)	Not applicable (engineering prototype evaluation)	Not formally rated; experimental proof-of-concept	Low – device engineering study without participant data	0 (bench study only)	USA	NA	NA	NA	NA	NA	NA	Material removal rate (volume removed per second); qualitative assessment of 3D and curvilinear cutting success	mm³/s (for material removal rate)	Not applicable	Material removal rate up to 571 mm³/s with stable cutting at varying tool speeds and cable tensions	Not reported (engineering performance data only)	The system enhances dexterity and reach in confined surgical spaces; PD tension control enables stable steering during cutting; demonstrates improved cutting stability and material removal rates compared with prior related work	NIH Grant 2R01EB016703 and collaborative research agreement with the Multi-Scale Medical Robotics Centre in Hong Kong
A triple-jaw actuated and sensorised instrument for grasping large organs during minimally invasive robotic surgery	Alireza Mirbagheri; Farzam Farahmand	Device design and bench/phantom experimental evaluation (original article)	Minimally invasive/robotic general surgery (abdominal organs)	Organ grasping and retraction (phantom/simulated testing)	Triple-jaw actuated and sensorised large-organ grasper (handheld robotic instrument prototype)	Laboratory bench and phantom testing at Robotic Surgery Lab, Sharif University of Technology/Tehran University of Medical Sciences, Iran	Not stated; calibration and tests performed at 1 min, 2 h, 4 h, and next day after power-on	Not applicable (no human or animal participants)	Preclinical engineering study (not rated)	Detailed methods, calibration and experimental protocols described; single-laboratory prototype validation	Bench-only tests; no blinding or comparator; sensor drift and cross-talk noted (~6.9 % FS)	0	Iran	NA	Yes	NA	NA	Index-finger cantilever button for handheld control; balanced handheld form factor; parallel jaw motion for stability and safety	Calibration at 1 min, 2 h, 4 h after power-on and next day; force-tracking tests over seconds; phantom grasping until visible (non-permanent) deformation	Accuracy and linearity of pinch-force sensing; cross-talk error; force-tracking rise time and steady-state error; ability to grasp without tissue damage or slippage; pinch-force vs grasping-diameter characterisation	N, V, mm, s, rpm per N	N/A	Calibration R² > 0.99; cross-talk ± 0.69 N (~6.9 % FS); rise time 469 ms; steady-state error 0.04 N; ramp max error 0.15 N; harmonic max error 0.66 N; ≈ 100 ms delay in handheld mode	Descriptive only (no inferential statistics)	Prototype effectively and safely grasped large soft objects with accurately controlled pinch forces; can serve as a handheld robotic grasper or teleoperation end-effector; enables force-based auto-grasping and gross tissue characterisation; further preclinical testing recommended.	Grant from Technology and Innovation Cooperation Office of I.R. Iran; authors state “No specific funding”; no conflicts of interest declared.
DEVELOPMENT OF handheld SURGICAL ROBOT ODRO-2 FOR AUTOMATIC BONE DRILLING	George Boiadjiev, Ivan Chavdarov, Kamen Delchev, Tony Boiadjiev, Rumen Kastelov, Kazimir Zagurski	Prototype development and preclinical benchtop experimental evaluation (bovine bone)	Orthopaedic surgery	Automatic bicortical bone drilling	ODRO-2 handheld orthopaedic drilling robot	Laboratory benchtop testing with bovine bone at Bulgarian Academy of Sciences/Orthopaedic and Trauma Clinical Centre, non-clinical	Not reported (example drilling sequence = 34.890 s)	Not applicable (no human or animal subjects beyond ex-vivo bone)	Not applicable (preclinical engineering evaluation)	Descriptive technical report with exploratory experiments; no controls or blinding	Potential measurement/selection bias; limited generalisability to clinical use	0 (human); number of bone specimens not reported	Bulgaria	NA	Yes	NA	NA	Parallel-axis drive shortening; continuous-press start button; real-time display; weight-reduction design; titanium components (planned)	Continuous during drilling (18 ms sampling; total run ≈ 35 s)	Thrust-force profile, total drilling time, cortical penetration depth, cortex/marrow thickness measurement	Newtons (force); millimetres (thickness/depth); seconds (time)	Not applicable	Near cortex = 9.4 mm; marrow cavity = 18.8 mm (calculated); far cortex = 8.7 mm; total depth = 36.9 mm; penetration ≈ 1 mm beyond far cortex; total drilling time = 34.890 s	Not applicable (no statistical analysis)	ODRO-2 shortens device length while maintaining functionality; new load cell and control system reduce signal noise and improve control; experiments verified precise breakthrough with minimal overshoot and real-time measurement; planned titanium build to further reduce weight; described as more user-friendly and reliable for orthopaedic surgery	Not reported
An active endoscope with small sweep volume that preserves image orientation for arthroscopic surgery	Geunwoong Ryu, Jeongryul Kim, Chulmin Park, Keri Kim	Prototype development with benchtop accuracy/repeatability testing and human cadaver feasibility/usability study (preclinical)	Orthopaedics – shoulder arthroscopy	Arthroscopic visualisation of biceps tendon and subscapularis region in human cadaver via posterior shoulder portal	handheld active robotic endoscope (3.5 mm diameter, 2-DOF roll/tilt) with thumb-operated joystick and image-orientation compensation	Laboratory bench tests and cadaver lab at Asan Medical Centre (Republic of Korea)	Not reported	Human cadaver(s) provided by Asan Medical Centre; single orthopaedic surgeon operator; no allocation/comparator described	Preclinical (Level V)	Not formally graded (engineering/preclinical study)	Single-surgeon use, no comparator, qualitative usability only	0 live participants (1 human cadaver used)	Republic of Korea	Yes	Yes	Surgeon reported intuitive thumb control and no perceived image-orientation change during manipulation	Monitoring of add‑on exchange need (count)	Thumb joystick control, software orientation compensation, joint-steering mechanism with zero bending radius	Single bench session (31 repeated motions) and two cadaver scenarios in one lab session	Accuracy = difference between commanded and measured tip tilt; Repeatability = structural similarity index (SSIM); Feasibility = successful visualisation of target anatomy	Degrees; SSIM (unitless); mm³	Single-arm preclinical study (no groups)	Accuracy error = 3.2° (4.5%); mean SSIM = 0.9798 (SD 0.0048); sweep volume = 104 mm³; cadaver visualisation of biceps tendon and subscapularis successful	Not applicable (no statistical testing reported)	Active endoscope enabled wide viewing with very small sweep volume, preserved image orientation, and intuitive one-hand control; authors note need for higher-resolution sensor and clinical testing	Korea Institute of Science and Technology (KIST) Institutional Program (Grant 2E30260)
Design and Development of Light-weight Needle Control Device for Automated Tissue Sampling	Youngjin Moon, Sanghoon Park, Jongseok Won, Jun Beom Seo, Jaesoon Choi	Device development with preclinical experimental evaluation (bench accuracy test, ex‑vivo porcine, in‑vivo porcine)	Interventional radiology (image‑guided percutaneous biopsy)	Percutaneous core needle biopsy/tissue sampling	Light‑weight Needle Control Device (automated tissue sampling robot; prototype; hand‑held or robot‑arm mountable)	Engineering lab/phantom, ex‑vivo porcine lab, and in‑vivo porcine under CT (preclinical)	Not reported	Not applicable (preclinical - no human participants/allocation described)	Not applicable (preclinical)	Not assessed	Developer‑led in‑house evaluation; small sample; no control/comparator; non‑randomised; no blinding; force read‑out not validated against a reference; abstract/conclusion emphasize 100% success while one in‑vivo trial reported 9/11 successes	0 human participants (number of animals not reported)	South Korea	NA	Yes	NA	NA	Hand‑held grip, side covers, lightweight (1.52 kg), compact dimensions, linkage trigger, sensor‑based initialisation, insertion‑force display	Single‑session tests: bench accuracy with 30 repeated movements; ex‑vivo 10 biopsies; in‑vivo trial 1: 11 biopsies; in‑vivo trial 2: 12 biopsies	“Sampling success” defined as biopsy needle containing sampled tissue; positioning accuracy defined as average discrepancy between commanded and measured spring‑block position; Force shown on UI from load cell;	mm (position error), % or fraction (success rate), N (force capacity; exact forces not reported)	Not applicable (no intervention groups)	Accuracy: mean error to command 0.0368 mm; repeated‑motion average error 0.0621 mm (n=30). Ex‑vivo: 10/10 successful samples. In‑vivo: trial 1 = 9/11 successful; trial 2 = 12/12 successful. Force gauge observed but values not validated/reported	No estimates with CIs or p‑values reported	Authors conclude the device is >40% lighter than prior models, provides sensor‑based initialisation and insertion‑force monitoring, achieves high mechanical accuracy and (as stated) 100% sampling success in ex‑vivo and in‑vivo experiments, and is suitable for hand‑held or robot‑arm use	Korea Health Technology R&D Project via KHIDI/Ministry of Health & Welfare (HI17C2410) and Asan Institute for Life Sciences, Asan Medical Centre (2019‑692).
Precision freehand sculpting for unicondylar knee replacement: design and experimental validation	Branislav Jaramaz, Constantinos Nikou	Preclinical laboratory experimental validation using synthetic femur models with three operators, no comparator	Orthopaedics – knee arthroplasty	Unicondylar knee replacement femoral bone preparation	Precision Freehand Sculpting (PFS) semi‑active hand‑held robotic bone‑sculpting tool with Exposure Control and Speed Control	Laboratory bench setting using Sawbones models, Polaris Spectra optical tracking and MicroScribe coordinate measuring arm	Not reported	Three users (experienced, intermediate, novice) each cut five identical synthetic femurs following a fixed protocol (distal and anterior‑distal facets with 5‑mm cylindrical bur under Exposure Control, posterior facet and post holes with 6‑mm spherical bur under Speed Control), no randomisation, no human participants	Not applicable (preclinical bench study)	Not formally assessed	Potential bias from industry involvement and author affiliations, small sample, bench setting, no blinding or comparator, predetermined use of modes by facet	3 operators and 15 specimens, 0 patients	USA	NA	Yes	NA	NA	Hand‑held semi‑active tool with exposure vs speed control, protective guard, tracked handpiece, foot‑pedal speed modulation	Immediate post‑cut assessment per specimen, facet cut times recorded during cutting	Accuracy defined as 6‑DOF transform between planned and fitted implant position (roll, pitch, yaw and Tx, Ty, Tz) with resultant angle and Euclidean distance, plus cutting time for cylindrical/exposure and spherical/speed facets and total time	Degrees, millimetres, minutes: seconds	Not applicable (each specimen used both modes by design)	Exposure Control (cylindrical bur facets) mean cut time 04:35 with SD 00:38 and range 03:36–05:55, Speed Control (spherical bur facets) mean cut time 03:26 with SD 00:33 and range 02:43–04:26, total cut time mean 08:01 with SD 00:48 and range 06:27–09:32, overall alignment error mean angle 1.08° with SD 0.53 and range 0.16–1.84, mean distance 0.54 mm with SD 0.23 and range 0.13–0.91	None reported	PFS achieved mean error 0.54 mm and 1.08° with acceptable cutting times, both control modes produced accurate cuts though Exposure Control was ergonomically preferable, user experience had little effect on accuracy or time, further cadaver studies planned	Funding not stated in the article, authors affiliated with Blue Belt Technologies (device developer).
Design Concept of Hybrid Instrument for Laparoscopic Surgery and Its Verification Using Scale Model Test	Yoon‑Ho Kim, Yong‑Jai Park, HyunKi In, Chang Wook Jeong, Kyu‑Jin Cho	Engineering design and bench verification study with scale‑model tests and proof‑of‑concept experiments	Single‑port laparoscopic surgery/minimally invasive surgery	Not applicable - device development rather than a specific procedure	Hybrid hand‑held articulated laparoscopic instrument with tendon‑gear mechanism and servomotor compensation (prototype)	Laboratory bench setting	Not reported	Not applicable - no human participants	Not applicable (nonclinical engineering study)	Not assessed	Author‑developed prototype with bench‑only validation, limited external validity and potential reporting bias	0	Republic of Korea	NA	Yes	NA	NA	Extra DOFs at end‑effector, tendon‑gear mechanism, servo compensation of tendon elongation	Not applicable	Engineering outcomes - kinematic relationships, input–output relationships under equivalent loading, demonstration of output‑loss compensation	Not applicable	Not applicable	Not applicable	Not applicable	Scale‑model tests agreed with real‑size model under equivalent loading and proof‑of‑concept experiments demonstrated output‑loss compensation	Supported by grant NRCRT‑EX15001 from the Translational Research Centre for Rehabilitation Robots, Korea National Rehabilitation Centre, Ministry of Health & Welfare, Korea.
Robotic Scanning Device for Intraoperative Thyroid Gland Endomicroscopy	Haibo Wang, Shuxin Wang, Jinhua Li, Siyang Zuo	Experimental preclinical engineering study (device development with bench and ex vivo handheld evaluation)	Endocrine/Head & Neck (thyroidectomy context)	Intraoperative confocal laser endomicroscopy scanning (ex vivo evaluation; intended for thyroidectomy / neck dissection)	handheld robotic scanning device with spiral trajectory and fibre Bragg grating (FBG) force sensing	Laboratory bench and ex vivo porcine tissue	Not reported	Not applicable (preclinical device tests)	Not applicable (engineering feasibility)	preclinical; descriptive; proof-of-concept; no control group	Small sample of scans; no blinding; only bench/ex vivo tests; possible selection/performance bias	0 (preclinical)	China	NA	Yes	NA	NA	Handheld structure (255 g, 288 mm length, 9 mm shaft, 29 mm handle); passive linear structure; FBG force sensor; spiral groove drive; Nitinol lever; rotation-prevention mechanism	During bench and handheld scans (continuous acquisition 15 fps)	Probe–tissue contact-force stability; mosaiced area and ratio; tangential velocity; mosaic success rate	N (Newtons); mm²; ratio; mm/s; Hz (frame rate 15 Hz)	Not applicable	– Bench (lens tissue): mosaics 17.87 & 18.98 mm² (ratios 0.84 & 0.77); force 0.19–0.38 N. – Tremor simulation (passive linear structure): force 0.11–0.44 N. – handheld (porcine tissue): mosaics 10.79 & 29.35 mm² (ratios 0.693 & 0.72); force 0.07–0.60 N (peak 1.12 N); 3 / 5 scans acceptable.	Not applicable (no inferential statistics reported)	The device can scan large surfaces in a controlled spiral while maintaining stable probe–tissue contact; passive linear structure mitigates hand tremor; bench and ex vivo results demonstrate feasibility and potential clinical value for intraoperative margin assessment (~29.35 mm² area achieved in ~66 s at max tangential velocity 1.91 mm/s).	National Natural Science Foundation of China (61773280, 51290293); Key Technologies R&D Program of China (2017YFC0110401); Tianjin Municipal Science & Technology Department (16JCYBJC40700)
A robotised handheld smart tool for orthopaedic surgery	Shuo‑Suei Hung; Alex Shao‑Feng Hsu; Tsung‑Han Ho; Chau‑Hwa Chi; Ping‑Lang Yen	Preclinical laboratory experimental study (ex vivo porcine cadaver) evaluating a handheld orthopaedic robot	Orthopaedic spine surgery	Pedicle screw fixation - pedicle tunnelling/bone drilling	Prototype robotised handheld smart tool (in‑house PKM‑based handheld robot; ~250 mm length, ~80 mm diameter, ~1.5 kg)	Laboratory - ex vivo porcine spine with optical tracking and navigation	Not reported	Not applicable - no human participants (single porcine spine specimen prepared with CT registration)	Not applicable (preclinical, non‑clinical)	Not formally assessed (engineering proof‑of‑concept)	Single‑lab prototype testing on a single specimen; no comparator or blinding; measurement bias and limited generalisability possible	0 human participants; 1 porcine spine cadaver specimen	Taiwan	Yes	Yes	Qualitative usability/fatigue comments only; no standardized questionnaires	NA	Weight/size balance; ergonomic HMI with guided region; minimized reaction forces via control redundancy	During simulated targeting/drilling, recorded continuously (optical tracker 60 Hz; motor servo 1 ms; traces ~0–5–6 s)	During simulated targeting/drilling, recorded continuously (optical tracker 60 Hz; motor servo 1 ms; traces ~0–5–6 s)	mm; N; s	Not applicable (no groups/participants; conditions compared were handle within 5 mm vs up to 15 mm from target)	Within 5 mm region: Fx 1.4 N, Fy 2.7 N, Fz 1.8 N; Up to 15 mm away: Fx 5.0 N, Fy 3.8 N, Fz 2.0 N; Tremor: tool ±1 mm vs hand 7–9 mm (X), 2–3 mm (Y);Force spikes observed when far from target (e.g., +23 N to −34 N in X)	Not reported (no hypothesis testing/CI)	Compact handheld robot achieved ±1 mm tool stabilisation and reduced force artefacts when the handle was kept in a guided region; proper HMI guidance helps avoid workspace limits and improve usability; future work should quantify drilling forces and tactile feedback	Ministry of Science and Technology, Taiwan (MOST 109‑2218‑E‑002‑035)
Design and Evaluation of a Catheter Contact-Force Controller for Cardiac Ablation Therapy	Daniel Gelman, Allan C. Skanes, Mohammad A. Tavallaei, Maria Drangova	Preclinical bench/phantom evaluation of a handheld robotic catheter contact‑force controller	Cardiac electrophysiology (interventional cardiology)	RF catheter ablation - catheter‑tissue contact force control	Catheter Contact‑Force Controller (CCFC) handheld device	Laboratory linear motion phantom mimicking cardiac/respiratory motion	Not reported	Not applicable (no human/animal participants)	Not applicable (preclinical engineering study)	Not formally appraised	Single‑lab developer evaluation, phantom‑only testing, no comparator or randomisation	0	Canada	NA	NA	NA	NA	NA	Immediate/real‑time bench testing, durations for FTI regulation not detailed	Ability to regulate catheter‑tissue contact force to prescribed targets and respond to sudden motion, and to regulate force according to an FTI model	grams (g) for contact force, root‑mean‑squared error (g)	Not applicable	Not applicable, key performance example - at 25 g target CF RMSE 3.7 ± 0.7 g	Not reported	Device regulated catheter‑tissue contact force in a laboratory setting that mimics clinical ablation and CF control may improve precision and success of lesion delivery	Canadian Institutes of Health Research Grant MOP‑115184, Ontario Research Fund, NSERC CREATE in Computer‑Assisted Medical Interventions, Heart and Stroke Foundation of Ontario Career Investigator Award.
An Enhanced Intelligent Handheld Instrument with Visual Servo Control for 2-DOF Hand Motion Error Compensation Regular Paper	Yan Naing Aye; Su Zhao; Wei Tech Ang	Preclinical benchtop experimental engineering study (device development and evaluation)	Microsurgery	Simulated micromanipulation with tremor and drift compensation under optical microscope	ITrem2 intelligent handheld instrument (3-DOF piezo-actuated micromanipulator with inertial and vision sensing)	Laboratory benchtop under optical surgical microscope (no live participants)	Not specified; individual test runs 2.5–10 s	None (no human or animal participants)	Not applicable – preclinical engineering study	Proof-of-concept preclinical evaluation; adequate methods for benchtop repeatability, but limited external validity	Simulated conditions only; no randomisation, blinding, or independent validation; sensitive to disturbance and limited to 2-DOF motion	0	Singapore	NA	Yes	NA	NA	Handheld form factor; internally-referenced IMU; microscope-mounted camera vision feedback; 3-DOF piezo tip actuation	Pre- vs post-manipulator engagement within each short run (2.5–10 s)	Root mean square error (RMSE) of tool-tip position before and after compensation 45769	Micrometres (µm) for position; hertz (Hz) for tremor frequency	Not applicable	• Oscillatory motion RMSE before 24.4 µm → after 8.12 µm (67 % reduction) • Physiological tremor RMSE before 16.25 µm → after 7.12 µm (56.16 % reduction)	Not reported (descriptive data only)	ITrem2 achieved automatic visual servoing and reduced erroneous hand motion by ≈67 % for oscillatory motions and ≈56 % for physiological tremor. Authors note current setup limited to 2-DOF, sensitive to disturbances, and not yet adequate for true handheld cancellation. Further 6-DOF sensing development needed	Agency for Science, Technology and Research (A*STAR) and College of Engineering, Nanyang Technological University
Shared Control for a Handheld Orthopedic Surgical Robot	Ping-Lang Yen; Tsung-Han Ho	Laboratory experimental (bench testing) comparison of shared control vs cooperative control	Orthopaedics	Not a clinical procedure - benchtop surgical simulation (tool tracking and control evaluation)	Handheld orthopaedic surgical robot with embedded parallel kinematic manipulator (PKM)	Laboratory (National Taiwan University)	Not reported	Not applicable (engineering evaluation; no human participants)	Not applicable	Not assessed (preclinical engineering study)	Not assessable	0 (bench study only)	Taiwan	NA	Yes	NA	NA	Handheld structure, embedded PKM, handle-based HMI, shared control between operator and PKM, guiding pose region optimized for dexterity maximisation and kinetic energy minimisation, tremor suppression and motion stabilisation	Not reported	Improvement in tracking accuracy and reduction in force artifacts under shared vs cooperative control	Not reported	Not applicable	Not reported numerically; shared control showed improved performance vs cooperative control	Not reported	Shared control with handle-based HMI improved tool tracking accuracy and reduced force artifacts without intermittent pauses compared with cooperative control using a tool-based HMI.	Ministry of Science and Technology, Taiwan (MOST 107-2218-E-002-025; MOST 108-2218-E-002-012)
A Handheld Steerable Surgical Drill With a Novel Miniaturized Articulated Joint Module for Dexterous Confined-Space Bone Work	Yan Wang, Hao Zheng, Russell H. Taylor, Kwok Wai Samuel Au	Engineering device development with benchtop experimental evaluation	Orthopaedics, Neurosurgery, ENT (bone work)	Steerable bone drilling and tissue removal in confined spaces	Handheld steerable surgical drill with 4.5 mm miniaturized tip and ±65° bend, tendon-driven geared rolling joint plus double universal joint, compact actuation unit	Engineering laboratory benchtop experiments, no clinical participants	Not reported	Not applicable - no human or animal participants	Not applicable (preclinical engineering study)	Not formally assessed	Developer-led bench testing, no randomisation or blinding, limited generalisability to clinical use	0	Hong Kong, USA	NA	Yes	NA	NA	Slim lightweight handheld form factor supporting single-handed grip, 4.5 mm tip, ±65° distal bend, compact handle/actuation unit	Not applicable	Not applicable	Not applicable	Not applicable	Not applicable	Not applicable	The prototype demonstrated high distal dexterity and could remove target tissues through small passages/incisions with minimized collateral damage, shows potential for dexterous bone work in confined spaces	CUHK Chow Yuk Ho Technology Centre of Innovative Medicine, Multi-Scale Medical Robotics Centre InnoHK Grants 8312051 and RGCT42-409/18-R, SHIAE Grant BMEp1-17, Natural Science Foundation of China Grant U1613202.
A Low-Cost Flexure-Based Handheld Mechanism for Micromanipulation	U‑Xuan Tan, Win Tun Latt, Cheng Yap Shee, Wei Tech Ang	Device design and benchtop performance evaluation	Ophthalmology and microsurgery	Intraocular needle micromanipulation, illustrative bench use	Handheld 3‑DOF piezoelectric‑actuated flexure‑based micromanipulator, parallel mechanism, rapid prototyped	Not stated	Not reported	Not applicable	Not applicable	Not assessed, engineering design paper	No clinical participants, bench tracking evaluation only	0	Singapore	NA	Yes	NA	NA	Compact handheld form, rigid parallel mechanism, flexure joints, piezoelectric actuation, rapid prototyped structure	Not applicable	Tracking performance of needle tip during 10 Hz input tracking	Not reported, frequency 10 Hz mentioned	Not applicable	Not applicable	Not applicable	Low‑cost handheld flexure‑based 3‑DOF micromanipulator was built using rapid prototyping, parallel mechanism chosen for rigidity and compactness, flexure joints eliminate backlash and assembly errors, experiments demonstrated 10 Hz tracking, potential to enhance microsurgery and cell micromanipulation	College of Engineering, Nanyang Technological University, and Agency for Science, Technology and Research A*STAR SERC Grant 052 101 0017.
MINARO HD: control and evaluation of a handheld, highly dynamic surgical robot	Manuel Vossel, Meiko Müller, Annegret Niesche, Lukas Theisgen, Klaus Radermacher, Matías de la Fuente	Preclinical bench/phantom experimental evaluation (device development and technical performance characterisation)	Orthopaedics - knee arthroplasty	Bone burring/milling for unicompartmental knee arthroplasty on synthetic bone phantom	MINARO HD handheld robot (3 DOF)	Laboratory bench testing with synthetic bone phantom, robot fixed to table during tests, optical tracking with fusionTrack 500 and real‑time control on dSPACE platform	Not reported	Not applicable	Not applicable (preclinical technical study)	Not graded	Industry‑supported, single‑centre bench testing, single measurement per setting, manipulator fixed to table rather than handheld during tests	0 (no human or animal participants)	Germany	NA	Yes	NA	NA	Handheld 2.5 kg, single‑hand grip, integrated activation button, 3 DOF five‑bar linkage plus linear drive, small footprint, no rigid fixation	Not applicable	Dynamic control performance: step response metrics (latency, rise, overshoot, settling), maximum compensation frequency computed as f=1/(2T), positioning error versus disturbing movement speed	ms, Hz, mm, mm/s, percent	Not applicable	Motion controller step response 90% reaching time forward/sideways/diagonal 39/27/33 ms and overshoot 0.4/0.6/0.6 percent, control loop 90% reaching time 42/27/30 ms and overshoot 3.5/10.0/3.6 percent, positioning error slope 0.025 mm per mm/s with 0.048 mm offset, accuracy ≤0.5 mm up to 18 mm/s, maximum compensation frequency 12–19 Hz	Not applicable (descriptive study, no hypothesis testing)	Authors conclude the handheld MINARO HD meets requirements for dynamic motion compensation, accuracy (0.5 mm at up to 18 mm/s) and feed rate for unicompartmental knee arthroplasty, and can compensate human tremor	EUROSTARS program Project ID 10585 and MinMaxMedical SAS, with Open Access funding enabled by Projekt DEAL.
Toward Improving Safety in Neurosurgery with an Active Handheld Instrument	Sara Moccia, Simone Foti, Arpita Routray, Francesca Prudente, Alessandro Perin, Raymond F. Sekula, Leonardo S. Mattos, Jeffrey R. Balzer, Wendy Fellows‑Mayle, Elena De Momi, Cameron N. Riviere	Preclinical phantom‑based experimental evaluation of a handheld robotic instrument with deep‑learning vessel segmentation, 3D reconstruction and forbidden‑region virtual‑fixture control	Neurosurgery (microsurgery)	Vessel‑avoidance assistance during microneurosurgery (phantom interactions and segmentation of real surgical frames)	Micron (actively stabilised handheld micromanipulator)	Laboratory (stereomicroscope, vascular phantoms, analysis of frames from neurosurgery video)	Virtual‑fixture evaluation: 25 trials × ~80 s each, segmentation testing on 100 phantom images, 3D reconstruction on 10 phantoms, plus ~6‑min surgical video for segmentation	Not applicable - no human or animal participants, images selected for clarity, 90/10 split for real‑surgery frames, 220/10 split for phantom dataset, augmentation applied	Not applicable (preclinical engineering study)	Preclinical engineering study, no clinical quality grading, adequate methods description, limited external validity	Potential selection and performance bias due to phantom models, small test sets, lack of blinding or randomisation, and dataset augmentation that may not reflect clinical variability	0	Italy and USA	NA	Yes	NA	NA	Handheld form factor, active tremor cancellation, virtual‑fixture collision avoidance, optical tracking, limited tip workspace (4×4 mm), intuitive operation emphasized	Single session bench tests with continuous measurements across ~80 s per trial	Primary outcomes: segmentation performance (Dice, sensitivity, specificity, accuracy) and time per image, 3D reconstruction density (number of 3D points) and reprojection error distances, virtual‑fixture performance defined as the proportion of time in forbidden zone (err percent) and penetration depth (err) with dsafety=2 mm	DSC/Se/Sp/Acc (unitless), time (s), distances (μm and mm), counts (points), percentages (%)	Not applicable - no participants or groups	Segmentation, median DSC 0.96 for FCNN vs 0.45, 0.54, 0.55 for three conventional methods, 3D reconstruction, median 17,170 points and 0.48 s vs 12.5 points and 0.11 s for SURF+FLANN, Virtual‑fixture, median err percent 24 percent and median penetration depth 16.9 μm, Real‑surgery frames, median DSCs 0.76 superficial vessels, 0.71 petrosal vein, 0.86 basilar artery, see Table 3 p33, Table 4 p34, …	Wilcoxon signed‑rank tests used, significant differences reported for proposed method vs conventional segmentation and for segmentation time across network depths (p<0.05), no confidence intervals or exact p‑values reported	The system feasibly assists safe vessel avoidance in neurosurgical contexts using a handheld robot, segmentation was accurate on phantoms and the tool tip’s median penetration when control was active was very small, supporting potential to improve safety	Partial funding by U.S. National Institutes of Health (R01EB000526)
Monocular Vision-Based Retinal Membrane Peeling With a Handheld Robot	Yuqiao Han; Arpita Routray; Jennifer O. Adeghate; Robert A. MacLachlan; Joseph N. Martel; Cameron N. Riviere	Preclinical laboratory experimental study on an artificial retina phantom, within-subject repeated-measures comparison (aided vs unaided), Latin-square balanced order, single operator	Ophthalmology – Vitreoretinal surgery	Retinal membrane peeling (engaging and delaminating with a bent needle tip)	Micron – 6-DOF actively stabilised handheld micromanipulator (New Scale Technologies prototype) with virtual fixtures (hard stop, motion scaling) and velocity limiting	University laboratory, artificial phantom under surgical microscope with optical tracking and load-cell force recording	Six days (6 sessions × 16 trials; first 3 training, last 3 testing)	One user (operator); within-subject comparison; retrials only for technical failures; order balanced by Latin square	Not applicable (preclinical/phantom)	Fair – objective force metrics and balanced order; limited external validity (single operator, phantom, no blinding)	Single-operator learning effects; no blinding; phantom tissue not physiological; Latin-square predetermined sequence; potential manufacturer involvement not discussed	1 (operator)	USA	NA	Yes	NA	NA	Motion scaling, hard stop, velocity limiting, tremor cancellation, 6-DOF handheld control	Per trial during engaging (downward) and delaminating (upward) phases of each peeling trial	Mean maximum downward force, mean maximum upward force, maximum Z-depth excursion below estimated retinal plane	Force (mN); Depth (µm) [velocity limit 1 mm/s]	Aided 24 trials; Unaided 24 trials (of 1 operator)	Unaided: Downward force 33.5 ± 10.5 mN; Upward force 11.9 ± 4.1 mN; Max depth 3646 ± 303 µm Aided: Downward force 22.6 ± 9.6 mN; Upward force 7.4 ± 2.7 mN; Max depth 1016 ± 262 µm	Downward force reduced 32.5% (p < 0.005); Upward force reduced 37.5% (p < 0.005); Penetration depth reduced 72.3% (p < 0.005)	A fully handheld robot with motion scaling and hard-stop virtual fixtures significantly reduces applied forces and surface penetration during simulated membrane peeling; the approach addresses limitations of prior designs and is feasible for vitreoretinal microsurgery	U.S. National Institutes of Health (Grant Nos. R01EB024564, R43EY026304, R01EB000526)
Imageless robotic handpiece-assisted total knee arthroplasty: a learning curve analysis of surgical time and alignment accuracy	Peter Savov, Lars-Rene Tuecking, Henning Windhagen, Jonathan Ehmig, Max Ettinger	Observational case–control (consecutive series, learning-curve analysis)	Orthopaedic surgery - knee arthroplasty	Primary total knee arthroplasty (restricted kinematic alignment for varus knees; mechanical alignment for valgus knees)	NAVIO® imageless handheld robotic system (Smith & Nephew); handheld robotic handpiece with semi-autonomous burr	Single academic centre (Hannover Medical School, Germany); single senior surgeon; elective inpatient TKAs	March 2018 – March 2020 (≈ 24 months)	140 consecutive primary TKA patients - 70 conventional manual TKAs and first 70 robotic-assisted TKAs; nonrandomised; technique discussed with patients; no exclusion criteria; all with multi-compartmental or mono-compartmental OA and ACL insufficiency	III (nonrandomised comparative study)	Moderate - single-surgeon design, independent double-observer measurements (Cohen’s κ = 0.818)	Selection bias (group inhomogeneity, single surgeon, nonrandomisation, potential conflicts of interest)	140	Germany	NA	NA	NA	NA	NA	Intraoperative (surgery time) and immediate postoperative (radiographic alignment)	Primary - Learning-curve length (surgery time from incision → suture; CUSUM analysis) Secondary - Accuracy of alignment = absolute difference between postoperative radiographs and intraoperative plan (HKA, LDFA, MPTA, tibial slope, joint-line shift)	Minutes (time); degrees (°) for angles; millimetres (mm) for joint-line shift	70 robotic/70 conventional	Robotic TKA: Surgery time 69 ± 12 min (range 47–112); HKA 2.0 ± 1.2°; MPTA 1.0 ± 0.8°; LDFA 1.6 ± 1.3°; Slope 1.4 ± 1.3°; Joint-line shift varus (0.9 ± 1.7 mm medial, 1.9 ± 2.3 mm lateral), valgus (2.6 ± 1.6 mm medial, 3.7 ± 1.8 mm lateral). Conventional TKA: Surgery time 67 ± 18 min (range 46–116); Joint-line shift varus (−0.7 ± 2.4 mm medial, −1.2 ± 2.9 mm lateral), valgus (−0.1 ± 2.3 mm medial…	Surgery time P = 0.491; 90% CI −7.9 to +3.2 min → equivalence not met; post-traumatic OA outlier risk LDFA OR 17.67 (95% CI 3.33–90.4; P < 0.001); HKA OR 8.66 (1.72–35.28; P = 0.002); Joint-line shift valgus medial difference 2.6 mm P < 0.01, varus lateral difference 3.1 mm P < 0.01	Learning curve completed after 11 cases; robotic TKA surgery time similar to conventional post-learning curve; no learning curve for implant positioning; system precise to < 2°; may enable different joint-balancing strategies for valgus vs varus morphotypes; pre-op HKA positively correlates with post-op joint-line distalisation	No funding received; open-access fees via Projekt DEAL; educational consultancies declared (ME & HW for Stryker; ME & PS for Smith & Nephew)
Handheld Automated Microsurgical Instrumentation for Intraocular Laser Surgery	Sungwook Yang, Louis A. Lobes Jr, Joseph N. Martel, Cameron N. Riviere	Preclinical cross-over experimental eye‑phantom study comparing automated handheld robotic laser photocoagulation with manual operation	Ophthalmology - vitreoretinal surgery	Intraocular laser photocoagulation (triple‑ring pattern) via 23‑gauge sclerotomy	Micron 6‑DOF active handheld micromanipulator (Carnegie Mellon), laser probe with visual servoing and depth regulation	Laboratory eye‑phantom under operating microscope	Not reported	Two retinal surgeons by convenience from collaborating centres, both performed both interventions in repeated trials (3 per setting), cross-over design without randomisation	Not applicable (preclinical)	Fair (clear methods and repeated measures, but small operator sample and no randomisation/blinding)	Potential bias from small n=2 surgeons, operator learning effect, one surgeon had prior Micron experience, developer‑led study, non‑blinded measurement, interpolation used for frequency equivalence	2 surgeons	USA	NA	NA	NA	NA	NA	Per trial during the same session, immediate post‑trial measurements	Primary outcomes were 2D targeting error (distance between burn centroid and target after fiducial realignment), execution speed as targets per second, axial depth fluctuation as RMS deviation from reference plane, erroneous outcomes defined as untreated burns due to insufficient energy or misaimed burns when error >300 µm or multiple burns aggregated, demonstration of vessel avoidance	Micrometres for error and depth, Hz (targets/s) for speed, percent for erroneous outcomes	Automated n=2 surgeons, Manual n=2 surgeons (within‑subject cross-over, 48 trials total, 32 targets per trial)	Automated: error 45±27 to 60±37 µm as threshold increased 50–200 µm, frequency 0.69–1.71 targets/s, depth RMS 18±2 µm, erroneous burns 0%; Manual: error 102±67 to 174±98 µm at 1.0–2.5 Hz, depth RMS 296±30 µm, untreated 5.2–12.5%, misaimed 2.1–20.1%	Error reduction automated vs manual at equivalent frequencies - 1.00 Hz 48±28 vs 102±67 µm, 53.0% reduction, p=3.29×10^-20 | 1.25 Hz 51±29 vs 113±69 µm, 55.0%, p=1.16×10^-23 | 1.50 Hz 58±36 vs 124±71 µm, 53.6%, p=4.13×10^-24 | 1.75 Hz 61±37 vs 139±83 µm, 56.4%, p=9.17×10^-25, no confidence intervals reported	Automated intraocular laser surgery using a handheld micromanipulator improved targeting accuracy, maintained constant depth and avoided critical structures in a model eye, with no failed burns, but further development is needed for clinical application	U.S. National Institutes of Health R01 EB000526 and Kwanjeong Educational Foundation.
Hybrid position/force control of an active handheld micromanipulator for membrane peeling	Trent S. Wells, Sungwook Yang, Robert A. MacLachlan, Louis A. Lobes Jr., Joseph N. Martel, Cameron N. Riviere	Preclinical experimental laboratory and in-vivo animal model study with within-subject comparison of position-only vs hybrid position/force control (randomised order of modes across trials)	Ophthalmology (vitreoretinal)	Retinal membrane peeling on artificial phantom and chick chorioallantoic membrane (CAM) model	Micron handheld micromanipulator (6DOF, active tremor suppression, hybrid position/force control, fibre-Bragg-grating force sensor)	Laboratory benchtop under surgical microscope and preclinical in-vivo animal model	Not reported	Four operators (1 vitreoretinal surgeon with 37 years’ experience, 3 non-clinicians trained >3 hours) performed trials in both models with control modes randomly varied	Not applicable (preclinical study, not classifiable on clinical LoE scales)	Moderate for preclinical work (objective force metrics and randomised mode order, but small operator sample and no blinding)	Small operator sample, mixed experience levels, potential learning/sequence effects, lack of blinding, non-human models	4	USA	NA	NA	NA	NA	NA	Intra-procedure only (during membrane-peeling tasks)	Primary: peak (maximum) and RMS force along x and y axes during peeling; Secondary: procedure duration; animal model: number of CAM tears	Force (mN), time (s), tears (count)	Not applicable (within-subject cross-over; all 4 operators used both control modes)	Artificial phantom: Position control: max force x = 7.5 ± 2.7 mN, y = 10.0 ± 3.5 mN Hybrid control: max force reduced by 46% (x) and 63% (y); RMS reduced by 32% (x) and 41% (y) Duration: 80.7 ± 64.1 s (position) vs 69.7 ± 40.4 s (hybrid) Animal model: Position control: max force x = 15.7 ± 5.5 mN, y = 12.5 ± 5.3 mN Hybrid control: x = 7.2 ± 1.4 mN, y = 5.2 ± 1.3 mN CAM tears: 1.4 ± 1.4 (position)…	Artificial phantom - significant reduction in max force along both axes (p < 0.05); no difference in duration (p = 0.57). Animal model - significant reduction in max force along both axes (p < 0.05); no difference in CAM tears (p = 0.81) or duration (p = 0.72).	Hybrid position/force control with a handheld micromanipulator attenuated forces (~56% reduction in maxima) and minimized unwanted excursions during membrane peeling without increasing procedure time.	U.S. National Institutes of Health (R01EB000526)
Towards Robot-Assisted Retinal Vein Cannulation: A motorised Force-Sensing Microneedle Integrated with a Handheld Micromanipulator	Berk Gonenc, Jeremy Chae, Peter Gehlbach, Russell H. Taylor, Iulian Iordachita	Laboratory phantom experimental study; multi-user repeated-measures cross-over comparing Tremor-Canceling Mode (TCM) vs Automatic Position-Holding Mode (PHM) of the handheld robotic system (Micron); evaluation of puncture-detection algorithms and stability performance	Ophthalmology - vitreoretinal surgery	Simulated retinal vein cannulation (venous puncture + maintained position in vinyl-membrane phantom)	Micron handheld micromanipulator + motorised force-sensing microneedle	University laboratory; ophthalmic microscope; artificial phantom submerged in balanced-salt solution simulating intraocular environment	Not stated (each trial = 45 s post-puncture hold; 24 trials per user in Experiment 2)	Three operators: Non-surgeon with 5 years’ Micron experience (no clinical cannulation experience) Ophthalmology fellow (moderate experience; 2 h training) Expert vitreoretinal surgeon (1 h training) Each performed 12 TCM and 12 PHM trials in random order.	Not applicable (preclinical bench study; no patients)	Moderate for preclinical engineering study (controlled setup, randomised mode order, objective metrics; small sample size and unblinded users)	Developer–investigator involvement; unequal training times; possible learning/fatigue effects; artificial phantom limits generalisability	3 human operators	USA	NA	Yes	NA	NA	Handheld Micron device with piezoelectric actuators (1×1×0.5 mm workspace); FBG force sensing; linear motor with thumb FSR control; 45° bent 70 µm microneedle	Post-puncture measurements at 15 s, 30 s, 45 s of 45-s hold period	Primary - time needle tip remained within specified radial zones (100–500 µm) around puncture point; Secondary - mean and maximum deviation from puncture point; puncture force and detection accuracy	Seconds (s); micrometres (µm); millinewtons (mN); mN/s; mN·µm/s²	Each operator performed 12 TCM and 12 PHM trials (24 per operator)	User 1 mean time-in-zone (TCM → PHM): 100 µm 5.41 → 13.27 s; 200 µm 14.39 → 27.17 s; 300 µm 22.37 → 37.15 s; 400 µm 30.82 → 39.12 s; 500 µm 34.93 → 39.83 s. Mean deviation from puncture (µm, TCM → PHM): User 1 15 s 276.18 → 90.34; User 2 overall 854.98 → 553.06; User 3 812.06 → 412.32.	PHM significantly increased time-in-zone vs TCM (p < 0.05) for 100–300 µm zones; no significant difference at 400 µm (p = 0.07) or 500 µm (p = 0.26). No difference in puncture force between modes (p = 0.83) or between users (p = 0.12). Rate of force drop differed by user (p = 0.019).	Combining force-based puncture detection with automatic position holding enables sustained intravenous cannulation and significantly reduces post-puncture motion of the microneedle, particularly for small diameter “veins,” thereby reducing tissue trauma and supporting safer retinal vein cannulation.	U.S. National Institutes of Health (2R01EB000526, 1R01EB023943); Johns Hopkins University Research to Prevent Blindness funds; The J. Willard & Alice S. Marriott Foundation; The Gale Trust; H. Ehlers; B. Wilbur; Raj C. Shaw; Ron Stiff
A Handheld Hydraulic Soft Robotic Device With Bidirectional Bending End-Effector for Minimally Invasive Surgery	Chi Cong Nguyen, Timotius Teh, Mai Thanh Thai, Phuoc Thien Phan, Trung Thien Hoang, James Davies, Hoang-Phuong Phan, Chun H. Wang, Nigel H. Lovell, Thanh Nho Do	Device development and mathematical modelling with benchtop experimental validation (preclinical engineering study	Cardiovascular (endovascular), Gastrointestinal	Blood clot removal (endovascular mechanical thrombectomy), cardiac ablation	Handheld hydraulic soft robotic catheter with bidirectional bending end-effector and portable ergonomic control interface	Laboratory engineering development and testing (no clinical participants)	Not reported	Not applicable (no human participants)	Not applicable (non-clinical)	Not assessed (non-clinical study, insufficient information on risk-of-bias domains)	Industry funding from Intuitive Surgical noted and potential funding-related bias, no randomisation or blinding applicable	0	Australia	NA	Yes	NA	NA	Portable ergonomic control interface, single soft actuation source enabling bidirectional bending and spiral shapes, soft materials to navigate intricate anatomy, aims to reduce hysteresis and force loss compared with pull-wire systems	Not applicable	Not applicable	Not applicable	Not applicable	Not applicable	Not applicable	Prototype soft robotic catheters with bidirectional bending and a portable ergonomic interface may enable quicker, more accurate navigation for targeted ablation and thrombus removal	Technology Research Grant from Intuitive Surgical (RG204224) and UNSW Scientia Fellowship (PS46197) Nguyen
An intuitive surgical handle design for robotic neurosurgery	Emmanouil Dimitrakakis, Lukas Lindenroth, George Dwyer, Holly Aylmore, Neil L. Dorward, Hani J. Marcus, Danail Stoyanov	Preclinical bench/simulation study, single-participant within-subject comparative evaluation (conventional rigid tool vs handheld robotic handle prototype)	Neurosurgery (expanded endoscopic endonasal approach)	Simulated peg-transfer task in EEEA-like constraints (no clinical patients)	Handheld robotic instrument handle: forearm-mounted 4-DoF joystick mapping wrist yaw/pitch/roll and gripper to a tendon-driven 3-DoF spherical-joint end-effector (3.6 mm diameter, 19.7 mm length)	University laboratory/simulation environment (custom task simulator in CoppeliaSim with optical tracking and 3D-printed skull phantom)	NR, per-participant session maximum ≤82 min (20 attempts × 2 min per tool + two 1-min familiarisation runs)	One expert consultant neurosurgeon specializing in EEEA, convenience sample, fixed order: conventional tool first then prototype (non-randomised)	Not applicable (preclinical/simulation)	Low (single participant, nonrandomised order, surrogate task, no blinding, descriptive only)	Order effect and learning/familiarisation, single-operator, unblinded, custom simulator, limited generalisability	1	United Kingdom	Yes	Yes	SURG-TLX workload across six domains, figure indicates lower scores for prototype, exact values NR	RULA worst-posture score 3 (conventional) vs 2 (prototype), task success rate and completed task rate recorded	Forearm-mounted handle, finger-operated gripper, resting neutral pose, direct mapping of wrist to robot joints, weight 431 g, adjustable straps, 4-DoF joystick	Single session: 20 attempts per tool (max 2 min each), RULA scored at worst posture during task, SURG-TLX completed after tasks	Success rate = hoops transferred/total, Successful attempts rate = tasks with all 6 hoops transferred/total, RULA = posture category, SURG-TLX = workload per domain	Percent, counts, RULA ordinal score, SURG-TLX score (0–20 per domain	Within-subject: prototype n=1, conventional tool n=1 (same surgeon)	Prototype: attempts until first completion 2, average success rate 80%, successful attempts rate 20%, RULA 2; Conventional tool: attempts until first completion NA (never completed), average success rate 40.83%, successful attempts rate 0%, RULA 3	Not reported (no inferential statistics, no p-values or CIs)	Proposed handle improved task success and ergonomics vs conventional tool with minimal apparent learning curve, forearm-mounting alleviated wrist strain without sacrificing dexterity, further user studies needed	Wellcome/EPSRC WEISS at UCL (203145Z/16/Z), EPSRC (EP/P027938/1, EP/R004080/1), H2020 FET (GA 863146), National Brain Appeal, NIHR UCLH BRC, Royal Academy of Engineering CiET1819\2\36, EPSRC Early Career Research Fellowship (EP/P012841/1)
A 2-DOF Needle Insertion Device Using Inertial Piezoelectric Actuator	Jie Deng; Shenghui Liu; Yingxiang Liu; Liang Wang; Xiang Gao; Kai Li	Engineering development and bench-top experimental evaluation (prototype characterisation)	Ophthalmology (vitreoretinal, proposed application)	Microneedle insertion/vitreoretinal injection (proposed)	2-DOF arched needle insertion device (driven by inertial piezoelectric actuators) with handheld controller	Laboratory bench testing (engineering lab)	Not reported	Not applicable (no human or animal participants)	Not applicable (preclinical engineering study)	Not assessed (technical prototype paper)	Not reported; single-prototype bench testing only	0	China	NA	Yes	NA	NA	Compact 230 × 32 mm device; handheld controller for open-loop control; arched needle design; piezoelectric actuation	Not applicable	Device performance metrics (translational/rotational step distance, maximum velocity, maximum insertion force)	µm; mrad; µm/s; mrad/s; mN	Not applicable	Translational step 2.47 µm; rotational step 0.56 mrad; maximum velocities 382 µm/s and 200.9 mrad/s at 120 V; maximum insertion force 32 mN	Not applicable	Device achieved high-precision motion and compact design with handheld controller, providing a new option for precision biomedical operations	National Natural Science Foundation of China (U1913215, 51622502)
Design and Kinematics Analysis of a Robotic Pediatric Neuroendoscope Tool Body	Yash Chitalia; Seokhwan Jeong; Nancy Deaton; Joshua J. Chern; Jaydev P. Desai	Engineering design and benchtop kinematic evaluation (laboratory study)	Paediatric neurosurgery (neuroendoscopy)	Endoscopic third ventriculostomy/neuroendoscopic procedures for hydrocephalus (intended use)	Steerable two-degree-of-freedom (DoF) robotic tool body deployed through a rigid endoscope with a compact handheld controller (tendon-driven asymmetric notch joints; DC motor + lead-screw actuation)	Engineering laboratory (Georgia Tech RoboMed Lab, USA)	Not reported	None – device-level evaluation only	Not applicable (non-clinical engineering study)	Appropriate for preclinical prototype testing; peer-reviewed IEEE/ASME journal	Low – descriptive engineering study without participants	0	USA	NA	Yes	NA	NA	Handheld controller for steering; tendon-driven asymmetric notch joints; two-DoF steerable tip; optimized tendon routing to minimize coupling	Not applicable	Device performance – relationship between joint angle and tendon displacement; inter-joint coupling behaviour	Joint angle (degrees) vs. tendon displacement (mm); qualitative coupling	Not applicable	Four tendon-routing design variants tested for coupling and kinematics	Not applicable	Tendon routing strategies are critical for minimizing coupling in meso-scale tendon-driven robotic tools; combining asymmetric joint properties improves two-DoF performance	Children’s Healthcare of Atlanta
Portable manipulation system for commercial robotic surgery forceps	Mustafa V. Yazıcı, Mertcan Koçak, Mustafa O. Oztan, Erkin Gezgin	Prototype development and benchtop engineering verification (motion‑capture)	Minimally invasive laparoscopic surgery (generic/non‑procedure‑specific)	Benchtop laparoscopic manipulation tasks with articulating forceps - no clinical procedure	Handheld 4‑DoF portable manipulation system actuating commercial da Vinci robotic forceps (Needle Driver)	University laboratory box‑trainer style test platform with camera and motion capture (OptiTrack V100R2)	Not reported	Not applicable - no human/animal participants	Not applicable (preclinical engineering study)	Not appraised (feasibility/verification only)	Developer‑led testing, informal surgeon feedback without predefined measures, no comparator, limited external validity	0	Turkey	NA	Yes	NA	NA	Handle ergonomics and sensor placement (thumb/index/middle), reduced hand moment via centre‑of‑mass/pivot geometry, modular couplings, decoupling algorithm to reduce unintended motion	Single‑session benchtop tests; time‑series during pitch up/down (~25 s per trial; 2,200 samples per condition)	Z‑axis deviation (yaw‑axis deviation) during pure pitch motion; secondary: maximum tip travel	mm (deviation, tip travel); degrees (roll axis correction); dimensionless compensation ratio (Rd)	Not applicable - no participants (11 compensation‑ratio conditions, Rd 0.63–0.73, tested on one prototype)	Rd=0.73: roll −3.5°, max tip 30.2478 mm, sum 37.4710 mm² | 0.72: −3.5°, 30.2112 mm, 27.2882 mm² | 0.71: −3.3°, 30.1667 mm, 24.6812 mm² | 0.70: −2.9°, 30.4026 mm, 10.2058 mm² (lowest) | 0.69: −2.7°, 30.1626 mm, 10.3894 mm² | 0.68: −2.5°, 29.9997 mm, 11.6791 mm² | 0.67: −2.4°, 29.9152 mm, 11.6105 mm² | 0.66: −2.1°, 29.7709 mm, 17.2443 mm² | 0.65: −1.9°, 29.6742 mm, 20.4906 mm² | 0.64: −1.6°, 29.702…	Not reported	The handheld system can adopt da Vinci forceps and provide robotic‑like dexterity; a digital decoupling controller compensates unintended yaw during pitch, with an empirically refined optimal compensation ratio ≈ 0.70; prototype (currently tethered) showed increased dexterity and reachability on bench tests	No specific funding
Preliminary outcomes of kinematically aligned robot-assisted total knee arthroplasty with patient-specific cartilage thickness measurement	Kayhan Turan, Yalkin Camurcu, Murat Kezer, Yunus Uysal, Yusuf Onur Kizilay, Abdulaziz Temiz	Retrospective case series	Orthopaedic surgery – Knee arthroplasty	Kinematically aligned robot‑assisted total knee arthroplasty with intraoperative patient‑specific cartilage thickness measurement	NAVIO Surgical System (Smith & Nephew, USA) – image‑free handheld robotic system	Single centre, Turan & Turan Health Group, Bursa, Turkey, single experienced surgeon	Recruitment Jan 2020–Mar 2021, ~1‑year postoperative clinical follow‑up	Retrospective review of consecutive patients with varus gonarthrosis who underwent robot‑assisted kinematically aligned TKA; exclusions included incomplete records and lateral femoral condyle cartilage damage unsuitable for thickness measurement, plus additional exclusions for inappropriate standing full‑length radiographs	Level IV (case series)	Not formally assessed by authors	Single‑centre, single‑surgeon retrospective series without control group, potential selection and measurement biases	109 patients (142 knees)	Turkey	NA	NA	NA	NA	NA	Preoperative and postoperative radiographs (time not reported) and 1‑year postoperative clinical scores	Radiographic angles (HKA, mLDFA, mMPTA, JLOA, JLCA), clinical scores (KOOS subscales, KOOS‑JR, Oxford Knee Score, VAS pain and satisfaction, Forgotten Joint Score), preoperative UCLA activity	Degrees for angles, points for patient‑reported scores	Single arm, 109 patients (142 knees) received NAVIO‑assisted kinematically aligned TKA	Radiographic: HKA 11.0±6.1→2.3±3.0°, mMPTA 83.1±15.3→86.6±1.5°, mLDFA 87.8±18.2→89.3±2.8°, JLOA 1.3±8.3→0.4±4.4°, JLCA 5.2±2.7→0.7±0.7°; Clinical: KOOS Symptom 33.8±13.4→86.6±7.7, Pain 28.7±10.6→81.2±8.6, ADL 25.7±8.4→77.3±7.3, Sport 9.7±10.1→46.7±10.7, QoL 25.4±17.4→72.1±13.3, KOOS‑JR 24.0±9.5→72.3±8.3, Oxford 12.1±5.6→32.4±6.0, VAS pain 8.8±1.0→2.5±1.2, VAS satisfaction postoperative 8.3±1.5 on…	Paired t‑tests: HKA p<0.001, mMPTA p=0.029, mLDFA p=0.317, JLOA p=0.115, JLCA p<0.001; all KOOS subscales, KOOS‑JR, Oxford, VAS pain p<0.001; authors did not report confidence intervals	The authors conclude that kinematically aligned robot‑assisted TKA with patient‑specific cartilage thickness measurement preserved mLDFA and JLOA while significantly correcting HKA, mMPTA and JLCA, with significant improvements in clinical scores at ~1 year	No external funding reported
Design of a novel tendon-driven manipulator structure based on monolithic compliant rolling-contact joint for minimally invasive surgery	Dingzhi Zhang; Yilun Sun; Tim C. Lueth	Laboratory experimental engineering study (design, finite-element analysis, and bench testing of prototypes)	Minimally invasive surgery/laparoscopy (general surgery)	None (bench evaluation only; no clinical procedure performed)	Compliant rolling-contact joint (CRCJ)–based 3-DOF handheld laparoscopic manipulator prototype	University laboratory, Institute of Micro Technology and Medical Device Technology, Technical University of Munich, Germany	Not reported	Not applicable (no human or animal subjects)	Not applicable (preclinical engineering study)	Prototype engineering tests only; small sample numbers; no randomisation or blinding; no statistical comparison beyond regression fits	Minimal, given bench nature, but limited generalisability; potential fabrication/material variation bias	0	Germany	NA	Yes	NA	NA	Tendon-driven CRCJ prevents cable slack; higher torsional stiffness vs leaf-type joints; high compliance; max bending angle > 180°; compact structure	Single-session bench experiments (three types: bending, transverse compliance, compliant motion)	Bending stiffness (K = F₍c₎ / θ); transverse compliance (vertical displacement Δh vs transverse load F₍g₎); compliant motion (output force vs lateral displacement under cable tensions 1 N and 10 N)	Degrees (°); Newtons (N); millimetres (mm); N·mm	Not applicable; mechanical samples only - Experiment 1: CRCJ n = 3, Leaf-type 1 n = 3, Leaf-type 2 n = 3; Experiments 2 and 3: one sample per joint type	Experiment 1 (bending): CRCJ P₀ = 25.05 deg, P₁ = 8.48 deg/N Leaf-type 1 P₀ = 49.19 deg, P₁ = 9.41 deg/N Leaf-type 2 P₀ = 22.04 deg, P₁ = 2.70 deg/N Max bending: CRCJ > 180°, Leaf-type 2 ≈ 160°, Leaf-type 1 broke ≈ 3.6 N Experiment 2 (transverse compliance): CRCJ Δh > 30 mm before first break at F₍g₎ = 5 N Leaf-type 1 plastic deformation at 0.96 N; Leaf-type 2 hinge break at 1.46 N Experiment 3 (…	Not reported (descriptive/graphical comparisons only)	CRCJ demonstrates lower bending stiffness, higher compliance, and greater bending range (> 180°) than conventional leaf-type joints; FEA agrees with experiments; handheld 3-DOF laparoscopic manipulator prototype shows dexterity and reduced part count; further development for surgical applications recommended.	Open Access funding enabled and organized by Projekt DEAL; no specific grant declared.
Development and preliminary results of bimanual smart micro-surgical system using a ball-lens coupled OCT distance sensor	Dongwoo Koo, Hyun‑Cheol Park, Peter L. Gehlbach, Cheol Song	Development + preclinical bench/ex‑vivo evaluation with freehand comparator	Ophthalmology – vitreoretinal microsurgery	Bimanual membrane dissection (egg membrane model) and bimanual grasping/dissection in ex‑vivo open‑sky porcine retina	Handheld bimanual SMART system (CP SS‑OCT–guided micro‑forceps and micro‑scissors with dual PZT motors and ball‑lens–coupled OCT distance sensors)	Laboratory (water‑bath stability testing; in‑air model; ex‑vivo porcine eyes)	NR	NA	NA	Exploratory proof‑of‑principle preclinical study	Potential biases: small number of repeated trials, likely single‑operator, no randomisation/blinding, no inferential statistics	0 (no human/animal participants; ex‑vivo samples used)	South Korea & USA	NA	Yes	NA	NA	Handheld, ambidextrous bimanual design; ball‑lens OCT for off‑axis angles; dual PZT motors with feedback at 500 Hz; common‑path SS‑OCT with shared laser; micro‑forceps/scissors integration	Single‑session tasks; repeated 4× (water stability) + 4× (in‑air dissection) + 6× (ex‑vivo)	RMSE = root‑mean‑square tool‑tip height error vs target; completion time = time to finish dissection; SNR = OCT signal‑to‑noise ratio	μm; s; dB; Hz	NA (by participants); by trials: freehand dissection in air 4; SMART dissection in air 4; SMART ex‑vivo 6; freehand ex‑vivo trials NR	Air dissection (Table 1): completion time 13 s freehand vs 10 s SMART; RMSE (forceps) 165.84 μm freehand vs 16.46 μm SMART; RMSE (scissors) 292.86 μm freehand vs 15.91 μm SMART. Ex‑vivo: RMSE (forceps) 213.85 μm freehand vs 24.25 μm SMART; RMSE (scissors) 265.66 μm freehand vs 21.95 μm SMART	NR (no CIs/p‑values)	Authors conclude the bimanual SMART system feasibly and safely reduces axial tremor, improves precision (lower RMSE) and reduces dissection time in preclinical models, supporting translation toward vitreoretinal surgery	National Research Foundation of Korea (MSIP, No. 2015R1C1A1A01052915); NIH/NEI R01EY021540‑01; Research to Prevent Blindness; The J. Willard & Alice S. Marriott Foundation; Gale Trust; Ehlers Family Foundation; gift from Mr. Bill Wilbur.
Demonstration of Subretinal Injection Using Common-Path Swept Source OCT Guided Microinjector	Jin U. Kang, Gyeong Woo Cheon	Preclinical experimental bench/ex vivo study (gelatine phantom and ex-vivo bovine retina)	Ophthalmology (vitreoretinal)	Subretinal/intraretinal microinjection of fluorescein dye	Handheld CP-SSOCT-guided SMART microinjector (linear piezoelectric motor-driven handpiece)	Laboratory bench and ex-vivo bovine eye testing at Johns Hopkins University	Not reported	Not applicable (no human or live animal participants; ex-vivo tissue only)	Not applicable (preclinical device feasibility study)	Proof-of-concept; well-described methods but limited generalisability	Bench model only; no randomisation, blinding, or independent replication; performed in air, not intraocular fluid	0 (ex-vivo bovine eyes)	USA	NA	Yes	NA	NA	Active motion compensation, depth-locking algorithm, auditory signal feedback, needle-in-needle structure, compact handpiece	During dynamic insertion, ten-injection gelatin series (100 total), and ten ex-vivo retinal injections; 1-second pre-injection stabilisation hold each trial	Needle-tip depth error (root mean square error vs. target depth); achieved injection depth	µm (depth error), nL (volume), s (hold time)	Not applicable	– Dynamic insertion (gelatin): mean RMSE 3.85 µm – Multiple gelatin injections (100): mean achieved depth 600.26 µm; mean RMSE 5.31 µm (max 7.48) – Ex-vivo bovine injections (10): mean RMSE 9.38 µm (max 10.95) at target depth 200 µm; intended volume 50 nL	Not reported (descriptive only)	The handheld OCT-guided SMART injector precisely maintained needle depth with micron-level accuracy and reduced motion artifacts, demonstrating feasibility for subretinal injections; further development needed for clinical, in-fluid conditions.	NIH/NEI 1R01 EY021540 and Coulter Translational Research Grant
Real-time isolation of physiological tremor using recursive singular spectrum analysis and random vector functional link for surgical robotics.	Asad Rasheed, Jeonghong Kim, Wei Tech Ang, Kalyana C. Veluvolu	Algorithm development with offline human tremor dataset analysis plus bench‑top hardware‑in‑the‑loop experimental validation using a handheld microsurgical robot	Microsurgery (ophthalmic/vitreoretinal context)	Tremor isolation/compensation during micromanipulation tasks (pointing/tracing simulation)	iTrem2 hand‑held microsurgical robotic instrument	Laboratory bench under surgical microscope on an anti‑vibration table (open‑loop validation)	Not reported (task trials 30 s offline and 50 s experimental)	Offline dataset: 5 novices + 5 surgeons; 6 trials each (3 pointing, 3 tracing) at 1×/10×/20× magnification; experimental validation: 2 surgeons + 1 novice, 3 trials each; no randomisation or allocation	Not applicable (methodological/experimental study)	Not assessed/reported	Small experimental sample; open‑loop, not blinded; reuse of prior dataset; potential selection bias	13 total (10 in offline dataset + 3 in experimental validation)	Not reported (authors affiliated with Republic of Korea and Singapore)	NA	NA	NA	NA	NA	Offline trials 30 s per task at 250 Hz; experimental trials 50 s at 333 Hz; algorithm tested at 9‑ and 7‑sample delays (≈36 ms and ≈28 ms)	Primary: tremor‑filtering accuracy (%) and tremor RMSE; secondary: computational time	Percent accuracy; micrometres (μm) for RMSE; milliseconds (ms) for computation	Not applicable (same participants/records analysed under multiple algorithms; no between‑group allocation)	At 9‑sample delay, average % accuracy across all subjects - RSSA‑RVFL: pointing 84.45%, tracing 79.71%; RSSA‑ELM: pointing 77.75%, tracing 63.23%; MW RSSA‑RVFL: pointing 84.42%, tracing 79.69%; Enhanced MW RSSA‑RVFL: pointing 84.72%, tracing 79.75%. At 7‑sample delay - RSSA‑RVFL: pointing 79.58%, tracing 75.49%; RSSA‑ELM: pointing 66.93%, tracing 39.50%; MW RSSA‑RVFL: pointing 79.49%, tracing 75.…	No hypothesis tests reported; differences in average accuracy - at 9‑sample delay: +6.70 pp (pointing) and +16.48 pp (tracing) for RSSA‑RVFL vs RSSA‑ELM; at 7‑sample delay: +12.65 pp (pointing) and +35.99 pp (tracing); experimental validation: +8.63 pp	The proposed RSSA‑RVFL and its moving‑window variants outperformed prior methods in tremor isolation while reducing computational time; average accuracy 79.03% in experimental validation at a nine‑sample delay and alignment with sub‑30 ms real‑time requirements claimed	National Research Foundation (NRF) of Korea, Grant NRF‑2021R1A2C2012147. 1-s2.0-S0019057824006281-main
Handheld imageless robotic total knee arthroplasty improves accuracy and early clinical outcomes when compared with navigation.	Joshua Yeuk‑Shun Tran, Abbie Yan‑Tung Tang, Cham‑Kit Wong, Gloria Yan‑Ting Lam, Tsz‑Lung Choi, Rex Wang‑Fung Mak, Jonathan Patrick Ng, Kevin Ki‑Wai Ho, Michael Tim‑Yun Ong, Patrick Shu‑Hang Yung	Retrospective comparative cohort analysis of prospectively collected institutional registry data	Orthopaedics - knee arthroplasty	Primary total knee arthroplasty with imageless semi‑active robotic assistance versus accelerometer‑based navigation (standard medial parapatellar approach, measured resection, kinematic or mechanical alignment per surgeon)	NAVIO and CORI handheld imageless robotic systems (Smith & Nephew), comparator KneeAlign 2 accelerometer‑based navigation (OrthAlign)	Single‑centre tertiary referral hospital and affiliated joint replacement centre (Hong Kong SAR, China)	Recruitment 2017–2023 with follow‑up to 12 months postoperative	Adults ≥40 years with end‑stage knee osteoarthritis (Kellgren–Lawrence 3–4), exclusions included prior ipsilateral knee surgery, periarticular fracture, severe fixed flexion contracture >20°, multiligament instability, bone stock deficiency requiring augmentation or stems, neuromuscular disorder, infection, allocation non‑random with system chosen by availability and all surgeries by the same spe…	Level III (reviewer assessment, retrospective comparative study)	Moderate (reviewer assessment)	Selection bias from non‑random allocation, baseline functional imbalance (preoperative KSFS/KSS lower in ABN group), potential confounding from surgeon preference and alignment technique, learning‑curve effects, single‑centre design, patellar resurfacing not uniform, no conventional TKA comparator	153 patients (178 knees)	Hong Kong SAR, China	NA	NA	NA	NA	NA	Preoperative, 6 weeks, 3 months, 6 months, 12 months for functional scores plus early postoperative long‑leg radiographs for alignment	Alignment accuracy defined as absolute difference between planned alignment and postoperative hip‑knee‑ankle (HKA) angle, functional outcomes by Knee Society Knee Score (KSS) and Knee Society Function Score (KSFS)	Degrees for HKA, points for KSS/KSFS	RATKA 101 patients/112 knees, ABN 52 patients/66 knees	HKA absolute difference mean±SD - RATKA 1.69±1.32°, ABN 2.30±2.39°; KSFS 6 weeks - RATKA 60.7±18.6, ABN 46.9±26.9; KSFS 3 months - RATKA 75.3±14.4, ABN 65.3±21.7	HKA absolute difference p=0.029 (95% CI 0.1 to 1.2), KSFS 6 weeks p=0.001 (95% CI −22.0 to −5.7), KSFS 3 months p=0.004 (95% CI −16.8 to −3.3), ANCOVA‑adjusted KSFS: 6 weeks p<0.001 and 3 months p=0.025	RATKA provided more accurate alignment and better early functional recovery than accelerometer‑based navigation, supporting RATKA as a preferred technology while calling for larger multicentre studies	No financial support reported
A Handheld Robot for Endoscopic Endonasal Skull Base Surgery: Updated Preclinical Validation Study (IDEAL Stage 0)	Joachim Starup‑Hansen, Nicola Newall, Emmanouil Dimitrakakis, Danyal Z. Khan, George Dwyer, Keshav Iyengar, Dimitrios Psychogyios, John G. Hanrahan, Siddharth Sinha, James Booker, Danail Stoyanov, Hani J. Marcus	Preclinical randomised cross-over phantom resection study plus cadaveric qualitative user study (IDEAL‑D Stage 0)	Neurosurgery - endoscopic endonasal skull base and pituitary surgery	Endoscopic transsphenoidal phantom pituitary tumour resection tasks and cadaveric endonasal tasks comparing handheld robot versus standard ring curette	Handheld robot prototype v0.2 with ergonomic controller and articulated ring‑curette end‑effector, rotating joystick, closed‑loop control, larger motors	Single university teaching hospital simulation and cadaver lab using the UpSurgeOn TNS Box and one fresh‑frozen cadaver	Not reported (single‑session tasks, five attempts per instrument, three minutes each)	Participants recruited from a single university teaching hospital, stratified by expertise (experts, intermediates, novices), randomised cross-over order in the phantom study after a short standardized introduction, all participants used both instruments in the phantom arm, cadaver arm used the robot only	IDEAL‑D Stage 0 preclinical, clinical level of evidence not applicable	Moderate for a preclinical study given validated model and randomised cross-over but limited by small sample, single centre, no blinding or power calculation	Small sample and single‑centre recruitment, learning‑curve effects, lack of blinding, limited realism of the phantom task with some unrealistic gestures reported, occasional endoscope clash and minor end‑effector damage, industry funding and author equity stakes potentially introducing conflict of interest	8 in the phantom study and 6 in the cadaver user study	United Kingdom	Yes	Yes	SURG‑TLX total workload lower with robot versus standard (118 vs 156, p=0.006), physical‑demand subdomain lower (5.4 vs 42, p=0.03), post‑task ratings favored the robot for range of movement, comfort and precision, 7/8 overall preferred the robot (p=0.0027), interviews reported sufficient range in all planes, adequate force and ease of use	NA	Ergonomic handle, rotating joystick, return‑to‑neutral functionality, articulated distal end with interchangeable end‑effector, closed‑loop control in position and velocity modes, widened effective workspace from redesign	Five attempts per instrument in the phantom study with first and fifth attempts emphasized plus post‑task SURG‑TLX and questionnaire, single cadaver session per participant	Extent of resection (EOR) calculated by weighing tumor pre‑ and post‑task, SURG‑TLX composite workload score and subdomains, user preference and 1–5 ratings for ease of use, comfort, precision, integrity	EOR expressed as percent resected, SURG‑TLX as points, questionnaire as 1–5 Likert scale, preference as count	cross-over design - 8 participants performed both robot and standard in the phantom arm, no parallel groups, cadaver arm had 6 participants using the robot only	First attempt EOR median (IQR) standard 84% (65–91) vs robot 58.6% (52–77) p=0.055, fifth attempt EOR median (IQR) standard 80% (70–89) vs robot 83% (61–94) p=0.76, robot EOR improved across attempts p=0.38 and standard decreased p=0.95, novices first attempt standard 76% (60–86) vs robot 55% (52–91) p=0.62, intermediates/experts first attempt standard 87% (77–92) vs robot 71% (56–85) p=0.12, las…	EOR difference not statistically significant at the fifth attempt p=0.76, initial attempt favored standard p=0.055, total workload reduced by 38 points with the robot p=0.006, physical demand reduced by 36.6 points p=0.03, preference for robot significant p=0.0027, confidence intervals not reported	Robot achieved parity in effectiveness by the fifth attempt, reduced cognitive workload and was preferred by most clinicians, cadaveric testing showed sufficient range and force, overall acceptable and feasible for endoscopic neurosurgery but further iterative development is needed before in‑human trials	Wellcome (203145Z/16/Z) and EPSRC (NS/A000050/1) Centre for Interventional and Surgical Sciences UCL, NIHR Biomedical Research Centre at UCL, NIHR Academic Clinical Fellowships, Royal Academy of Engineering Chair in Emerging Technologies, EPSRC Early Career Research Fellowship, Panda Surgical Limited funding to several authors with some authors holding shares, additional author grants from Wellco…
Applicability of a Dexterity-Enhancing Handheld Robot for 360° Endoscopic Skull Base Approaches: An Exploratory Cadaver Study.	Joachim Starup-Hansen, Dan Zimelewicz Oberman, John G. Hanrahan, Emmanouil Dimitrakakis, Hani J. Marcus, Joao Paulo Almeida	Exploratory preclinical cadaveric feasibility and qualitative usability study (intra-procedural interviews)	Neurosurgery - endoscopic skull base	Eight endoscopic skull base approaches on cadavers (endonasal, transorbital, supraorbital, pterional–transsylvian, subtemporal, retrosigmoid, far lateral, suboccipital) where the handheld robot was used after standard anatomic exposure	Panda Surgical handheld robot - a 3-mm diameter, wristed, interchangeable end-effector controlled by a handheld joystick and trigger	Single-centre preclinical cadaver laboratory	Not explicitly stated	Four surgeons (two skull base consultants, two residents) from an independent neurosurgical unit with no ties to the device manufacturer; six cadaveric specimens; each surgeon performed multiple approaches	Not applicable (preclinical)	Exploratory, qualitative, low for clinical inference but appropriate for feasibility assessment	Small sample, subjective evaluation, no comparator or blinding; two authors hold equity in the device company; mitigated by independent evaluators	Four surgeons and six cadaveric specimens (eight approaches performed)	United Kingdom and United States (authors’ affiliations)	Yes	Yes	Reported awkward hand positioning with pistol-grip controller; device heavy and bulky; non-intuitive trigger/joystick control (especially when rotated); straight shaft hindered deep visualisation; large sharp tooltips risked vascular injury	NA	Handheld pistol-grip controller with joystick and trigger; 3-mm wristed end-effectors; cable to console; planned redesign to include non-pistol grips, reduced weight, improved trigger intuitiveness, variable shaft lengths and angulation, increased grasping forces	During each surgical approach after exposure; feedback collected intra-operatively	Feasibility = safe fit and ability to reach/manipulate tissue; Usefulness = workspace reach, tissue manipulation capability, and perceived clinical potential (see Table 1, page 3)	Binary/qualitative (e.g., feasible = yes/no; usefulness = yes/no)	Not applicable (single-arm evaluation)	Feasible in 8 / 8 approaches; workspace reach superior to conventional instruments in 6 / 8; useful tissue manipulation in 8 / 8	Not applicable	The handheld robot was feasible and potentially useful across a range of endoscopic skull base approaches, providing enhanced dextrous workspace and tissue manipulation. Future iterations should include improved ergonomics (lighter weight, non-pistol grips), shorter or angled shafts, and stronger/more varied end-effectors	National Institute for Health and Care Research (NIHR) – Invention for Innovation (i4i) Programme (NIHR206456); additional support from the Wellcome/EPSRC Centre for Interventional and Surgical Sciences (UCL) and NIHR Biomedical Research Centre at UCL.
A Multi-Cavity Touch Interface for a Flexible Soft Laparoscopy Device: Design and Evaluation	Jialei Shi; Ge Shi; Yu Wu; Helge A. Wurdemann	In-vitro bench and phantom testing with participant usability assessment (laboratory study)	Laparoscopic/Minimally Invasive Surgery	Phantom-based laparoscopic task simulation	Handheld flexible soft robotic laparoscopy device featuring a multi-cavity silicone-cast touch interface (five air-filled cavities, pneumatically driven continuum body, 11.5 mm diameter)	Laboratory test rig and phantom environment (University College London); human-participant usability evaluation under UCL ethics approval 12453/001	Not reported	Not reported	preclinical / engineering feasibility (not applicable to clinical LoE scale)	Not reported	Not reported	Not reported	United Kingdom	Yes	Yes	Usability ratings and participant feedback on intuitive control and practicality	NA	Multi-cavity touch interface; pneumatically driven flexible continuum shaft; soft silicone construction	Not reported	Functionality, usability, and practicality of the handheld device	Not reported	Single-device evaluation – no groups reported	Not reported	Not reported	The soft robotic handheld laparoscopy device with a multi-cavity touch interface demonstrated intuitive and cost-effective operation. In-vitro and participant usability evaluations confirmed functionality and practicality, laying the groundwork for future soft robotic instruments for minimally invasive surgery.	Academy of Medical Sciences Springboard Award (SBF003-1109); Engineering and Physical Sciences Research Council (EP/R037795/1, EP/S014039/1, EP/V01062X/1); Royal Academy of Engineering (IAPP18-19\264); UCL Dean’s Prize (UCL Mechanical Engineering); China Scholarship Council
Design and Validation of a Nonparasitic 2R1T Parallel Hand‑Held Prostate Biopsy Robot With Remote centre of Motion	Wenhe Jiang, Dongmei Wu, Wei Dong, Jiajun Ding, Zhichao Ye, Pei Zeng, Yongzhuo Gao	Preclinical controlled animal experiment (engineering design + evaluation: robot-assisted vs. freehand biopsy)	Urology (prostate)	TRUS-guided transperineal prostate biopsy (beagle model)	Nonparasitic 2R1T parallel handheld prostate biopsy robot with RCM (2-UPRR-UP)	Preclinical animal laboratory, single centre, 3D ultrasound guidance	Not reported	20 beagles of different sizes; all sampled once; single-operator (one doctor); allocation to robot-assisted vs control not described	Not applicable (preclinical/animal)	Low (small sample, nonrandomised, unblinded)	Single operator, unclear allocation, no blinding, possible measurement bias	20 beagles	China	NA	Yes	NA	NA	Handheld with integrated handle and button controls, OLED screen for angle/position display, 1.3 kg weight, limbs placed on one side to free workspace, centre of gravity optimized toward user’s hand, intended to reduce tremor	Immediate post-puncture (per experiment)	Puncture error = distance between needle tip and planned target on ultrasound	mm	Not specified; 20 total (divided between robot-assisted and control)	– Robot-assisted: mean 3.30 ± 1.63 mm (error range 1.01–6.98 mm) – Control (biopsy gun): mean 5.40 ± 1.76 mm (error range 2.33–8.10 mm)	Robot-assisted < control, p < 0.01	handheld robot improved targeting accuracy compared with freehand biopsy; achieved accuracy comparable to grounded robots with smaller size and lower cost; may reduce tremor and number of punctures.	National Key Research and Development Program of China (Grant No. 2018YFE0206900)
Imageless handheld robotic‑assisted total knee arthroplasty showed better clinical outcomes than conventional total knee arthroplasty: A randomised controlled trial with preliminary results at 1‑year follow‑up	Peter Bollars, Dinesh Nathwani, Ali Albelooshi, Max Ettinger, Frank Verheyden, Jan Mievis, Prashant Meshram, Martijn Schotanus	randomised controlled trial (single-centre, single-surgeon, 1:1 block randomisation, intention-to-treat)	Orthopaedic surgery - knee arthroplasty	Primary total knee arthroplasty for osteoarthritis - imageless handheld robotic-assisted TKA (RATKA) vs conventional instrumented TKA (CTKA)	NAVIO Surgical System (Smith & Nephew), imageless handheld semi‑autonomous robotic sculpting system	Sint Trudo Hospital, Sint‑Truiden, Belgium (single centre, single surgeon)	Recruitment March 2021–October 2022 with outcomes to 12 months post‑op	Adults undergoing primary TKA for OA; excluded if prior knee surgery causing malalignment or failed arthroplasty, active/recent infection, post‑traumatic OA with malalignment, pregnancy; digital random-number generator with block size 4, allocation 1:1	Level I	Good (adequately powered RCT, ITT analysis, ethics approval, CONSORT/GCP adherence)	Some concerns: no blinding of surgeon/participants; single-centre/surgeon; industry funding; one intraoperative cross-over; short (1‑year) follow‑up	180 randomised	Belgium	NA	NA	NA	NA	NA	Pre‑op, 3 months, 12 months (plus peri‑operative measures)	Primary outcomes: PROMs - OKS (0–48, higher better), KSS function (0–100), KSS satisfaction (0–40), KSS expectation (0–15), LEAS (1–18), EQ‑5D‑5L index (0–1) & EQ‑5D VAS (0–100), VAS pain day/night (0–100, lower better), VAS satisfaction (0–100, lower = more satisfied), FJS‑12 (0–100, higher better); peri‑operative metrics (operative time, blood loss, ligament release, implant sizes, LOS) and (S)…	Points on validated scales; minutes (operative time); millilitres (blood loss); days (length of stay); proportions (%)	randomised: RATKA n=90, CTKA n=90 (RATKA received allocated n=88; 1 cross-over to CTKA; 1 withdrew); ITT analysed: RATKA n=89, CTKA n=90	RATKA 12‑month PROMs - OKS 42.4±5.4; KSS‑function 81.2±12.3; KSS‑satisfaction 34.9±5.2; KSS‑expectation 10.3±2.1; LEAS 11.1±2.1; EQ‑5D index 0.883±0.141; EQ‑5D VAS 77.4±17.7; VAS pain day 10.5±12.5; VAS pain night 8.1±11.3; VAS satisfaction 6.9±8.5; FJS‑12 73.2±23.3. CTKA 12‑month PROMs - OKS 38.7±7.2; KSS‑function 72.7±15.1; KSS‑satisfaction 31.2±7.9; KSS‑expectation 9.3±2.6; LEAS 10.2±2.6; EQ‑5…	Between‑group differences at 12 months (RATKA–CTKA): OKS +3.7 (p<0.001); KSS‑function +8.5 (p<0.001); KSS‑satisfaction +3.7 (p<0.001); KSS‑expectation +1.0 (p=0.639, ns); LEAS +0.9 (p=0.163, ns); EQ‑5D index +0.050 (p<0.001); EQ‑5D VAS +5.1 (p=0.338, ns); VAS pain day −11.0 (p<0.001); VAS pain night −10.8 (p=0.029); VAS satisfaction −13.2 (p<0.001); FJS‑12 +19.6 (p<0.001). Peri‑operative: operati…	Authors conclude imageless handheld RATKA improved pain, function, satisfaction and joint awareness at 1 year vs CTKA, with fewer ligament releases and thinner poly inserts, similar early SAEs, slightly longer operative time and shorter hospital stay; longer‑term follow‑up is needed.	Investigator‑initiated RCT funded by Smith & Nephew (manufacturer of NAVIO).
Functional and radiological outcomes of computer‑assisted and handheld robotic total knee arthroplasty: A prospective randomised study	Anoop Jhurani, Piyush Agarwal, Gaurav Ardawatia, Hardik Sahni, Mudit Srivastava	Double‑blind (participant and assessor) prospective randomised controlled trial, single‑centre	Orthopaedic surgery - total knee arthroplasty (adult reconstruction)	Primary unilateral cemented posterior‑stabilised TKA with patellar resurfacing performed using either CAS or handheld robotics	Navio handheld imageless robotic system (Smith & Nephew)	Single tertiary centre (Joint Replacement Unit, Fortis Escorts Hospital, Jaipur, India)	Minimum 24‑month follow‑up (recruitment period not reported)	Adults 50–80 y with OA, deformity <20°; excluded inflammatory arthritis, BMI>35 kg/m², extra‑articular deformity, post‑traumatic arthritis, prior osteotomy; computer‑generated randomisation with sealed opaque envelopes opened pre‑op; patients and outcome assessor blinded	Level I	Good (randomised, pre‑registered, assessor‑ and patient‑blinded)	Potential performance bias (surgeons not blinded), single‑centre, implants from one manufacturer, lead‑author financial relationship with device company, numbers for registration time not reported, no explicit ITT	200	India	NA	NA	NA	NA	NA	Pre‑op; post‑op at 6 weeks, 3, 6, 12, and 24 months (plus intra‑op metrics)	Primary outcomes: PROMs (KSS, KSFS, WOMAC, KOOS, HFKS, VAS, FJS‑12) and radiological alignment (hip‑knee‑ankle axis, coronal femoral/tibial angles, joint line, patellar thickness, posterior offset); Secondary: hospital stay, blood loss (Hb‑balance method), registration time, complications; soft‑tissue releases; bone‑cut error = deviation between planned and achieved (degrees/mm) with accuracy als…	PROM points (0–100), degrees, millimetres, g/dL (blood loss by Hb method), counts (% within 0.5° for cut accuracy)	RAS n=100, CAS n=100	Key data - Accuracy within 0.5° (%): distal femur 51 vs 44, femoral rotation 46 vs 25, femoral flexion 44 vs 29, femoral coronal 56 vs 46, tibial cut 57 vs 50, tibial slope 36 vs 30, tibial coronal 58 vs 41; Average cut error (mean±SD): femoral rotation −0.02±0.6 vs −0.4±1.4, femoral flexion 0.06±0.6 vs −0.5±1.1, femoral coronal 0.08±0.4 vs 0.3±0.5, tibial cut 0.2±0.4 vs 0.07±0.5, tibial slope 0.…	P‑values - Soft‑tissue release overall P=0.04; 2‑y ROM P=0.005; registration time shorter with CAS P=0.0001 (values NR); cut‑error comparisons: femoral rotation P=0.01, femoral flexion P=0.007, femoral coronal P=0.004, tibial cut P=0.02 (favoured CAS), tibial slope P=0.0002, tibial coronal P=0.001; PROMs: 1‑y FJS P=0.0001; 2‑y KOOS P=0.0001, HFKS P=0.0001, FJS‑12 P=0.0001; KSS, KSFS, WOMAC NS at …	Handheld robotics reduced soft‑tissue releases and improved several accuracy parameters vs CAS; produced higher KOOS/HFKS/FJS‑12 at 2 y (differences mostly below MCID thresholds), suggesting potential for better patient satisfaction	No specific grant funding; lead author reports consulting fees/honoraria/support from Smith & Nephew.
Preclinical Evaluation of a Novel Steerable Robotic Neuroendoscope Tool	Kent K. Yamamoto, Timothy A. Brumfiel, Ronghuai Qi, Joshua J. Chern, Jaydev P. Desai	Preclinical in‑vitro within‑subject comparative evaluation (steerable vs rigid) using a paediatric ventricular phantom	Neurosurgery (neuroendoscopy)	Simulated intraventricular neuroendoscopic target‑reaching task (contacting three metal targets)	Handheld 2‑DoF joystick‑controlled nitinol continuum robotic neuroendoscope tool	Laboratory phantom model (Georgia Institute of Technology RoboMed lab), preclinical	NR (per‑participant training ≤15 min plus task execution)	Convenience sample of 17 (9 neurosurgery residents/fellows, 8 engineering graduate students); all used both tools with training on the steerable then task with steerable followed by rigid (nonrandomised, unblinded)	N/A (preclinical, phantom)	Not formally assessed/NR	Potential selection bias, order/learning effects (nonrandomised sequence), lack of blinding/counterbalancing, small sample, single simple task	17	USA	Yes	Yes	Ease of manipulation rated “very good” on average by medical participants and “good” by nonmedical; handheld design rated “good–very good” by medical with wider spread (“poor” to “excellent”) among nonmedical	NA	Handheld form factor with joystick and roll; two bending joints (proximal/distal); OD 1.93 mm, length 244.48 mm, 26.5 mm steerable segment; single‑use steerable tip with multi‑use handle	Training session (≤15 min), five target transitions per participant during task, immediate post‑task questionnaire	TRT = mean of five intervals between target contacts; TMV = minimum‑volume ellipsoid of endoscope motion at the burr hole from 6‑DoF EM trackers; questionnaire = 5‑point scale (unsatisfactory→excellent)	Seconds (TRT), cm³ (TMV), categorical Likert ratings	Steerable n=17 (medical 9, nonmedical 8); Rigid n=17 (medical 9, nonmedical 8)	Nonmedical - Training time: Rigid 23 ± 15.3 s, Steerable 225 ± 165 s; TRT: Rigid 12.5 ± 4.96 s, Steerable 31.5 ± 27.7 s; TMV: Rigid 0.924 ± 0.750 cm³, Steerable 0.658 ± 0.521 cm³. Medical - Training time: Rigid 4 ± 2.35 s, Steerable 164 ± 78.8 s; TRT: Rigid 5.90 ± 2.50 s, Steerable 15.0 ± 5.87 s; TMV: Rigid 0.501 ± 0.225 cm³, Steerable 0.178 ± 0.095 cm³	TMV reduction with steerable vs rigid: 28.79% (nonmedical) and 64.47% (medical); no p‑values or confidence intervals reported	Steerable tool required more training and had longer target‑reach times but substantially reduced endoscope movement volume - especially for medical users - potentially lowering parenchymal injury risk	Funded by NIH NICHD (R21HD101321) with additional support from Children’s Healthcare of Atlanta and internal Georgia Institute of Technology funds.
Comparing an imageless hand‑held robotic‑assisted system versus conventional technique for component positioning and early clinical outcomes in total knee arthroplasty	Hasegawa M, Hattori Y, Naito Y, Tone S, Sudo A	Nonrandomised comparative cohort (single centre, single surgeon; robotic vs jig‑based manual TKA) with 1‑year follow‑up	Orthopaedic surgery - knee arthroplasty	Primary total knee arthroplasty (midvastus approach; bicruciate‑substituting prosthesis)	Navio imageless hand‑held robotic‑assisted system (Smith & Nephew)	Tertiary academic centre - Department of Orthopaedic Surgery, Mie University, Tsu, Japan (single surgeon MH)	Recruitment April 2019–January 2022 with 1‑year follow‑up (≈ through January 2023)	Consecutive Navio TKAs (Jan 2021–Jan 2022) and control jig‑based TKAs when Navio unavailable (Apr 2019–Jan 2022)	Level III (retrospective/nonrandomised comparative cohort - author)	Moderate quality	Nonrandomised historical controls, baseline BMI imbalance, single surgeon/centre, learning‑curve and temporal biases, unblinded assessments, short follow‑up (our appraisal)	80	Japan	NA	NA	NA	NA	NA	Preoperative baseline; intraoperative laxity at 0°, 30°, 60°, 90°, 120°; early (~2‑week) postoperative radiographs; 1‑year postoperative clinical outcomes	Bone cutting error = |planned − achieved cutting angle|; Implantation error (Navio) = |planned − implanted| validated intraoperatively; Implantation error (radiographs) = |planned − implanted| on standing radiographs; HKA target 0°; outliers >3° from plan; ROM, KSS‑2011 (overall and subscales), FJS‑12, operative time	Degrees (°) for angles and HKA; minutes for operative time; points for KSS‑2011 and FJS‑12	Robot n=40; Manual n=40	Key summary - Radiographic implantation error (mean±SD): femur coronal 0.41±0.48 vs 1.66±1.47°; femur sagittal 0.90±0.80 vs 3.01±1.61°; tibia coronal 0.43±0.53 vs 0.83±0.87°; tibia sagittal 0.64±0.51 vs 2.26±1.78°; HKA 0.81±0.89 vs 1.26±1.24°; Outliers (>3°): robot 0 in all planes; manual 4 (femoral coronal), 14 (femoral sagittal), 8 (tibial coronal), 8 (tibial sagittal), HKA 3; Operative time 16…	Between‑group estimates (p values): femur coronal <0.001; femur sagittal <0.001; tibia coronal 0.024; tibia sagittal <0.001; HKA 0.112; outliers (femoral sagittal <0.001; tibial coronal 0.005; tibial sagittal 0.005; femoral coronal 0.116; HKA 0.241); operative time <0.001; ROM between‑group ns (pre p=0.118, post p=0.222); KSS‑2011 subscales all ns (see Table 3); FJS‑12 p=0.370	Authors conclude that the imageless hand‑held robotic system improved implantation accuracy (and reduced outliers) but early clinical outcomes were similar to manual TKA	No funding reported
Safety and Efficacy Clinical Trial of Robot‑Assisted Prostate Biopsy Using a Hand‑Held Robotic System	Wenhe Jiang, Yongzhuo Gao, Mingwei Wen, Qiangqiang Huang, Hui Dong, Huageng Liang, Dongmei Wu, Wei Dong	Prospective single‑centre clinical feasibility/efficacy trial with within‑patient nonrandomised controlled comparison (freehand systematic vs robot‑assisted targeted)	Urology (prostate)	Transperineal TRUS‑guided prostate biopsy (12‑core systematic freehand + 3‑core cognitive‑fusion targeted robot‑assisted)	Hand‑held TRUS‑guided prostate biopsy robot, 3‑DoF (yaw/pitch/translation) with remote centre of motion and needle‑changeable biopsy module	Single‑centre tertiary hospital operating theatre, Department of Urology, Union Hospital, Tongji Medical College (HUST), Wuhan, China	Not reported	20 men (57–80 y) with PSA > 4 ng/mL, consented; sequential within‑patient allocation: freehand 12‑core first, then robot‑assisted 3‑core targeted	Level III, prospective nonrandomised controlled	Low (pilot feasibility; small sample; single centre; unequal cores; no blinding; no hypothesis testing)	Selection bias; fixed order (freehand then robot) and learning‑curve/performance bias; detection bias from different strategies (systematic vs targeted) and unequal core numbers; partial error measurement (3/12 freehand cores measured)	20	China	NA	NA	NA	NA	NA	Intraoperative (targeting error, duration, sampling success) and postoperative pathology (cancer‑core rate)	Targeting error: distance between needle tip and target on ultrasound; sampling success: tissue obtained; cancer‑core rate: proportion of positive cores; duration per biopsy: total biopsy time divided by number of cores	mm; %; min	Within‑patient: all 20 received both; 223 freehand cores vs 47 robot‑assisted cores (errors measured on 60 freehand vs 60 robot biopsies)	Robot‑assisted: error 3.71 ± 1.41 mm; sampling success 78.3%; cancer‑core rate 19.1%; duration 6.94 min. Freehand: error 3.94 ± 1.49 mm; sampling success 92.9%; cancer‑core rate 12.6%; duration 1.62 min	Not reported (no CIs/p‑values)	Authors conclude robot‑assisted PBx slightly improves accuracy and cancer‑core rate and achieves ≤5 mm error (clinically significant tumour range) but has longer time and lower sampling success; further refinement and larger trials needed	National Key Research and Development Program of China (Grant No. 2018YFE0206900).
Clinical and patient‑reported outcomes of a novel robotic system in total knee arthroplasty	Farouk Khury; Ittai Shichman; Sophia Antonioli; Joshua Rozell; Morteza Meftah; Ran Schwarzkopf	Retrospective 1:1 propensity-score-matched cohort study (single-centre EMR review)	Orthopaedic surgery – Adult reconstruction / Knee arthroplasty	Robotic-assisted total knee arthroplasty (RATKA) vs conventional TKA (CTKA)	CORI handheld imageless robotic system (Smith & Nephew, Memphis, TN, USA)	Single, urban, high-volume academic hospital (NYU Langone Health, USA)	February 2021 – October 2024	Adults ≥18 years undergoing primary elective TKA for osteoarthritis. Excluded: prior/active infection, immunosuppression, oncologic disease, prior ipsilateral knee surgery, missing data. 289 RATKA matched 1:1 to 289 CTKA by age, sex, BMI, ASA, surgeon, implant, and articulation design. Logistic-regression propensity matching achieved covariate balance (effect size ≤0.2).	Design consistent with Level III	No formal rating reported.	Single-centre, retrospective design; potential selection bias; confounding; surgeon workflow variability; possible missed outside-hospital revisions; limited follow-up; possible learning-curve effect.	578 (289 RATKA; 289 CTKA)	USA	NA	Yes	NA	NA	handheld operation; imageless navigation; dynamic referencing; compact design simplifying intraoperative workflow.	Preoperative; 2 weeks; 3 months; 1 year post-op; 90-day window for ED visits/complications.	Length of stay (LOS); operative time; discharge disposition; 90-day ED visits; manipulation under anaesthesia (MUA); reoperations; revisions; PROMs (KOOS-JR, PROMIS Pain Intensity, PROMIS Pain Interference).	LOS = hours; operative time = minutes; events = n (%); PROMs = points or T-scores.	RATKA = 289; CTKA = 289	RATKA: LOS 30.04 ± 27.88 h; operative time 107.18 ± 24.48 min; 90-day ED 3.8% (0.34% surgery-related); MUA 2.07%; reoperations 0%; revisions 0%. 1-yr KOOS-JR 68.81 ± 17.15 (Δ +21.61 ± 17.03); PROMIS Pain Intensity 46.37 ± 8.38 (Δ −9.12 ± 8.63); PROMIS Pain Interference 56.97 ± 8.36 (Δ −7.93 ± 9.07). CTKA: LOS 51.91 ± 35.98 h; operative time 106.22 ± 34.12 min; 90-day ED 4.15% (1.38% surgery-relat…	LOS p < 0.001 (Cohen’s d = 0.68); operative time p = 0.349; ED p = 0.239; MUA p = 0.201; reoperations p = 0.369; revisions p = 0.117; KOOS-JR 1 yr p < 0.001 (d = 0.754); Δ KOOS-JR p = 0.059; PROMIS Pain Intensity 1 yr p = 0.011 (d = 0.427); Δ p = 0.032 (d = 0.413); PROMIS Pain Interference 1 yr p < 0.001 (d = 0.684).	The handheld CORI RATKA system produced significantly shorter hospital stays, fewer reoperations, and greater reduction in 1-year pain scores versus conventional TKA, though with a slightly higher (non-significant) manipulation-under-anaesthesia rate. The authors call for further studies to confirm these findings.	No financial support reported
Performance and operative outcomes’ evaluation of a hand‑held articulating laparoscopic device: a prospective clinical trial on the HandX™ platform	Nir Messer, Amir Ben Yehuda, Yuri Manoskin, Adam Abu‑Abeid, Yonatan Lessing, Fahim Kanani, Eran Nizri, Guy Lahat, Amir Szold	Prospective single‑arm pilot clinical trial (non‑comparative)	General surgery (multispecialty MIS: hernia, biliary, colorectal, upper GI, dialysis access)	Elective minimally invasive laparoscopic procedures performed using HandX as one of the operative instruments	HandX™ hand‑held motorised articulating laparoscopic platform (Human Xtensions, Israel)	Two‑centre hospital setting: Assuta Medical Centre (Tel Aviv) and Shamir Medical Centre (Be’er Ya’akov), Israel	Enrolment March 2018–January 2022; postoperative follow‑up minimum 14 days (median 24 ± 7.2 days)	Adults 18–85 with BMI 18–45 scheduled for elective laparoscopy, screened/enrolled by experienced MIS surgeons; single group (no randomisation)	Level IV (prospective case series/single‑arm)	Low (non‑comparative design, heterogeneous procedures, short follow‑up)	High risk of selection/performance bias (surgeon discretion over device use; vendor rep present in OR; one author co‑founder/equity holder; device supplied by manufacturer)	60	Israel	Yes	Yes	SUS overall mean 84.9 (SD 11.4) with high item scores for ease of use, integration, learning speed, confidence and low (better) scores for complexity/need for tech support (n=60)	NA	Motorised articulating handpiece with joystick‑like control, pistol grip, tactile feedback	SUS completed after device use in each case; in‑hospital daily postoperative review and ≥14‑day follow‑up (median 24 days)	Primary outcome: usability via SUS (0–100). Secondary: device deficiencies; conversion to conventional instruments; intraoperative complications (bleeding, organ injury, pneumothorax - bleeding predefined); postoperative morbidity including SSI (CDC) and SSO (Haskins et al.)	SUS score (0–100); counts/percentages for complications; days for follow‑up	Single arm: HandX n=60; none in comparator	SUS 84.9 (SD 11.4; n=60); conversions 0/60; device deficiency 1/60; intraoperative complications 0/60; postoperative events: superficial SSI 1/60 (1.7%), atrial fibrillation 2/60 (3.3%), pneumonia 1/60 (1.7%), asthma exacerbation 1/60 (1.7%), UTI 1/60 (1.7%); readmission for urinary retention 1/60 (1.7%); reoperations 0	Not applicable (no comparator; no inferential statistics reported)	Favourable user experience and no device‑related intraoperative or postoperative morbidity within 14 days; hand‑held articulating devices may serve as an intermediary between conventional laparoscopy and full robotic platforms	No specific funding; HandX device and instruments provided by Human Xtensions at no cost.
Digital Guide and Handheld Robot‑Assisted Tibial Tunnel Placement in Anterior Cruciate Ligament Reconstruction: A Cadaver Study	Hao-Cheng Zuo; Ping-Lang Yen; Shuo-Suei Hung	Cadaveric experimental study (paired comparison – handheld robot vs. conventional ACL guide)	Orthopaedic surgery – sports medicine/knee arthroscopy	Arthroscopic ACL reconstruction – tibial tunnel drilling (guide-pin insertion)	Custom smart handheld drilling robot (six-axis end-effector, optical tracking, digital navigation)	Simulation Medical Centre, Tzu Chi University, Taiwan	Not reported	One fresh-frozen cadaver (left knee); sequential interventions (first conventional guide, then handheld robot); non-randomised, unblinded	Not applicable (preclinical cadaveric study)	Very low (single-specimen feasibility study)	Single cadaver, order effect, lack of blinding or replication	1 knee (fresh-frozen cadaver)	Taiwan	NA	Yes	NA	NA	Compact handheld tool with dexterous six-axis end-effector and real-time navigation; automatic depth and distance feedback; CT- and fluoroscopy-free digital planning	Single intra-procedural measurement during drilling	Angular deviation from planned tunnel axis (AP and lateral views); Euclidean distance error between planned and achieved entry/exit points	Degrees (°) and millimetres (mm)	1 handheld-robot tunnel and 1 conventional-guide tunnel (within same knee)	Preoperative plan: AP 45°, Lat 45° Handheld robot: AP 46.3°, Lat 48.5°, entry error 1.14 mm, exit error 3.28 mm Conventional ACL guide: AP 76.8°, Lat 71.4°	Not reported (no inferential statistics)	The integrated handheld robotic navigation system achieved tibial tunnel angles within ~4° of plan and greater accuracy than a conventional ACL guide. It demonstrates feasibility of a CT- and fluoroscopy-free digital guide that may improve placement accuracy and reduce complications.	Research grant from Taipei Tzu Chi Hospital, Buddhist Tzu Chi Medical Foundation (TCRD-TPE-111-21)
Design, Optimisation, and Experimental Validation of a Handheld Nonconstant‑Curvature Hybrid‑Structure Robotic Instrument for Maxillary Sinus Surgery	Xuchen Wang, Xin Ma, Puchen Zhu, Wee Shen Ng, Huayu Zhang, Xianfeng Xia, Russell H. Taylor, Kwok Wai Samuel Au	Engineering design, optimisation, and experimental validation (bench-top and simulated surgery; preclinical evaluation)	Otolaryngology (Rhinology – Maxillary Sinus Surgery)	Maxillary sinus surgery tasks (functional endoscopic sinus surgery context)	Handheld Nonconstant-Curvature Hybrid-Structure Robotic Instrument (HNHRI), 4 DOF, 3.5 mm diameter	Laboratory - bench-top experiments and simulated surgery	Not reported	Not applicable (no human or animal participants)	Not applicable (engineering study)	High-quality engineering validation; lacks clinical testing	Potential performance bias due to simulation-based validation only	0	Hong Kong SAR (China), USA, China	NA	Yes	NA	NA	Handheld form factor, compact actuation, flexible hybrid nonconstant-curvature shaft for improved maneuverability	Single-session validation; no longitudinal follow-up	Device performance: reachability to target region, average dexterity index, bending and torsional stiffness compared with existing flexible instruments	Percentage (%)	Not applicable	Reachability to target region: 100% Average dexterity index: 48% within maxillary sinus Bending stiffness: +197% Torsional stiffness: +150% (vs. current flexible instruments)	Not reported (descriptive only)	HNHRI significantly improves dexterity and stiffness; may enhance efficacy and safety of maxillary sinus surgery by reducing incision size and surgery-related tissue damage.	National Natural Science Foundation of China (52205032); Guangdong Basic and Applied Basic Research Foundation (2023A1515010062); Chow Yuk Ho Technology Centre of Innovative Medicine (CUHK); Shun Hing Institute of Advanced Engineering (CUHK); Multiscale Medical Robotics Centre (InnoHK); Research Grants Council of Hong Kong (14209719, 14204423)
Efficacy and Safety of a Novel Handheld Robotic Needle Holder Versus Conventional Instrument in Laparoscopic Ureterolithotomy: A multicentre, randomised, Single‑Blind, Positive Parallel Controlled, and Noninferiority Clinical Trial	Zhiyong Wen, Yonglian Guo, Ziqiang Dong, Kun Yang, Xinghuan Wang	multicentre randomised single-blind positive parallel controlled noninferiority clinical trial	Urology	Retroperitoneal laparoscopic ureterolithotomy with intracorporeal ureteral incision suturing	HTH‑1 handheld robotic needle holder vs E705R conventional laparoscopic needle holder	Three university‑affiliated teaching hospitals in Hubei, China (Zhongnan Hospital of Wuhan University, Wuhan Central Hospital, Yichang Central People’s Hospital)	April–September 2018 recruitment, postoperative follow‑up to day 5	Adults ≥18 with ureteral calculi meeting prespecified indications, multiple exclusions, 1:1 randomisation via sealed opaque envelopes, statistician blinded, 3 control patients removed due to plan change, 47 completed	Level I (randomised controlled trial, not stated in paper)	Moderate	Single‑blind only, allocation concealment details limited, post‑randomisation exclusions in control group, small sample, possible learning‑curve effects, baseline urinary WBC imbalance	50 randomised, 47 analysed	China	NA	Yes	NA	NA	Multi‑degree‑of‑freedom movement, clutch function via foot pedal, modular components (control box, operating handle, end instrument), motorised articulation, bedside setup, cost economy, limited tactile force feedback noted	Intraoperative, postoperative day 3, postoperative day 5, early postoperative in‑hospital period	Primary STPS defined as total ureteral suture time divided by number of stitches, secondary outcomes total postoperative drainage volume and volumes on day 3 and day 5 plus operator‑rated instrument performance, safety outcomes intraoperative adverse events and interference with monitor/display plus postoperative blood tests and complications	Seconds (STPS), mL (drainage), Likert categories (performance), counts (adverse events)	HTH‑1 25 randomised 25 analysed, Conventional needle holder 25 randomised 22 analysed	STPS mean ± SD HTH‑1 186.50 ± 40.67 s vs Control 202.80 ± 46.87 s, postoperative drainage median (IQR) total 69 (42–120) mL vs 61 (49–95) mL, day 3 55 (31–95) vs 40 (30–65) mL, day 5 59 (37–107) vs 55 (42–90) mL, operating performance smooth in all cases in both groups, operation time 139.36 ± 50.09 min vs 144.91 ± 71.45 min, Clavien I complications 4 vs 3	STPS mean difference −16.22 s (95% CI −41.92 to 9.49), noninferiority margin 40 s, one‑sided 95% CI supports noninferiority, P<.0001	Authors conclude HTH‑1 is effective and safe and noninferior to a conventional needle holder for laparoscopic ureterolithotomy, with need for prior training and skills assessment	No external funding reported
Design and Preliminary Evaluation of a Handheld Compliant Robot for Membrane Peeling Using Negative Pressure Adsorption	Yu Zheng, Jianjun Liu, Yang Yang, Jingjun Yu, Chenhan Guang, Zhaodong Wang	Preclinical laboratory bench and handheld experimental evaluation (ex‑vivo chicken chorioallantoic membrane model)	Ophthalmology (vitreoretinal)	Retinal ERM/ILM membrane peeling	Handheld compliant robot with five‑chain parallel compliant module and force‑sensing tube using negative pressure adsorption	Laboratory bench test and handheld test on ex‑vivo CAM	Not reported	Not applicable (no human participants)	Not applicable	Not reported	Not reported	0	China	NA	NA	NA	NA	NA	Not reported	Disturbance force during membrane peeling and peeling force threshold for detachment	Millinewtons (mN), RMS and maximum	Not applicable	Not applicable	RMS disturbance force reduced 44.1% and maximum reduced 52.7%, CI and p values not reported	The proposed handheld compliant robot reduced disturbance forces in membrane peeling and provided passive safety via membrane detachment near 15 mN in ex‑vivo tests	Natural Science Foundation of Jiangsu Province BK20230366, National Natural Science Foundation of China 52205002, National Key R&D Program of China 2017YFB1302702.
Evaluation of the effect of a laparoscopic robotised needle holder on ergonomics and skills	Thierry Bensignor, Guillaume Morel, David Reversat, David Fuks, Brice Gayet	randomised cross-over experimental study (simulation-based)	General surgery (laparoscopic/digestive)	Laparoscopic suturing and peg-transfer tasks on a pelvitrainer	JAIMY 5-mm robotised comanipulated laparoscopic needle holder (Endocontrol, Grenoble, France)	Simulation laboratory (pelvitrainer setup, non-clinical)	Not reported; single experimental session per participant with ≥2 h washout between instrument trials	14 surgeons (8 senior, 6 residents), stratified by experience; randomised cross-over order (Jaimy → standard needle holder or vice versa); all had brief familiarisation training before testing	Not applicable (preclinical simulation study)	Moderate (objective measurements, randomisation, cross-over design; small sample, no blinding, single-session simulation)	Small sample size, potential learning/order effects, lack of blinding, limited external validity, manufacturer involvement (Endocontrol) with one author conflict of interest	14	France	Yes	Yes	NA	Posture: Rapid Upper Limb Assessment (RULA) score via motion capture Muscle workload: Electromyography (EMG) cumulative muscular workload (CMW) across six muscle groups	Ergonomic handle; joystick for yaw/roll; two intracorporeal DOF; 5 mm shaft; comanipulated haptic feedback	Each task performed once per instrument; 3 tasks per session (2–3 min each) with ≥2 h washout	RULA = postural ergonomics score (4–15, lower = better) CMW = area under normalised EMG curve (%MVC·time) Path length = sum of tip travel distance (cm) Movements = number of zero-velocity crossings Performance = quantity × quality score per task	RULA (points); EMG (%MVC·time); path length (cm); movements (counts); task score (points)	cross-over - 14 performed both interventions (7 started with Jaimy, 7 with standard holder)	RULA (mean ± SD): Jaimy 8.67 ± 1.1 vs NH 10.09 ± 1.4 (p < 0.001) Path length (cm): Jaimy 926.5 ± 189.4 vs NH 1131.5 ± 224.9 (p = 0.012) Movements: Jaimy 343.1 ± 57 vs NH 322.9 ± 31 (p = 0.39) EMG CMW (Flexor Carpi Ulnaris): Jaimy 15.96 ± 7.1 vs NH 9.85 ± 2.7 (p < 0.001) EMG CMW (Triceps): Jaimy 18.72 ± 9 vs NH 11.93 ± 8.6 (p = 0.027) Performance Task 1 (Peg-Board): Jaimy 22.5 ± 9.3 vs NH 34.5 ± 9…	See summary data for each intervention group; all reported as p-values, no confidence intervals provided	The robotised needle holder (Jaimy) improved surgeon posture and the quality of complex laparoscopic sutures, reduced instrument path length, and had a short learning curve. Some increased muscle activation due to handle stiffness was identified and corrected in later designs.	French state funds via ANR Investissements d’Avenir (Labex CAMI ANR-11-LABX-0004) and FUI Fluoromis project. Author conflict disclosed: one co-author (Guillaume Morel) is a scientific advisor to Endocontrol, manufacturer of Jaimy.
Learning Intracorporeal Suture on Pelvitrainer Using a robotised Versus Conventional Needle Holder	Elena Siri, Patrice Crochet, Axelle Charavil, Antoine Netter, Noémie Resseguier, Aubert Agostin	Prospective randomised parallel‑group simulation study (pelvitrainer)	Laparoscopic surgery training (gynaecology unit context, generic tasks)	Intracorporeal knot‑tying plus frontal and hexagonal sutures on FLS pelvitrainer	JAIMY robotised laparoscopic needle holder (Endocontrol, 5 mm shaft, bend 0–80°, 360° rotation, electrically powered, ergonomic handle)	Single‑centre simulation room at La Conception University Hospital, Marseille, France	March–December 2016 overall; per participant 2 peg‑transfer sessions + baseline test + 4 training sessions (10 knots/session) + post‑training evaluation at ~2 sessions/week	Volunteer 5th‑year medical‑student novices; randomised by sealed envelopes to JAIMY (dominant hand) vs two conventional holders (n=10 per arm)	Level not stated in article; randomised controlled simulation experiment (educational/ergonomics)	Moderate quality (randomisation and standardized tasks; strong inter‑rater reliability on subset) but small sample and partial blinding	Small sample; no a‑priori power calculation; assessor blinding limited by visible device; self‑reported workload (NASA‑TLX); single‑centre simulation limits generalisability	20	France	Yes	Yes	NASA‑TLX workload totals at three time points	NA	Articulated tip with 2 extra DOF (bend and axial rotation), ergonomic handle to keep wrist neutral, 5 mm diameter, powered actuation	Baseline; four training sessions; post‑training evaluation under conventional conditions; then ergonomically difficult tasks	LS raw score (time, error in mm, knot quality), GOALS (4 items scored 1–5; total 4–20 as autonomy item omitted), Moorthy checklist (26 items), frontal suture global score = quantitative×qualitative (quantitative = entry/exit accuracy; qualitative = knot count/quality), hexagonal suture global score = quantitative×qualitative (#points crossed × entry/exit accuracy), NASA‑TLX total (sum of 6 subsca…	Seconds, millimetres, counts, and unitless scores (FLS, GOALS 4–20, Moorthy 0–26, NASA‑TLX 0–120, global suture scores)	10 robotised vs 10 conventional	Key summaries - Baseline time (s): 317.5 [285–337] JAIMY vs 450.5 [308–561] control; Post time: 127 [113–156] vs 125.5 [111–142]. FLS total baseline: 281.75 [258–312] vs 172.25 [89–294]; FLS total post: 468 [440–487] vs 474.5 [456–489]. GOALS baseline medians: 9 vs 6.5; GOALS post: 14 vs 14. Moorthy baseline: 11.5 vs 11; Moorthy post: 20.5 vs 18. Frontal suture global: 15.75 [11–20] vs 3.75 [1.63…	Between‑group p‑values - Post‑test intracorporeal knot FLS total P=0.762; time P=0.677; GOALS post P=0.787; Moorthy post P=0.319. Frontal suture (JAIMY vs control): global P=0.006, quantitative P=0.003, qualitative P=0.022. Hexagonal suture global P=0.285. NASA‑TLX between‑group baseline P=0.911, post P=0.858, difficult P=0.909; within‑group NASA‑TLX baseline→post: JAIMY P=0.041, control P=0.066	Learning with the robotised holder was as fast as with conventional tools; performance equivalent on conventional tasks; the robotised holder conferred a significant advantage on ergonomically difficult “frontal” suturing; workload fell after training	No specific funding; authors report no competing interests.
